# Supplementary material
Source: PubMed Central journal article supplement (PMC5954620)
Supplement: mmc2.pdf [file mmc2.pdf]

# Effects of mRNA Degradation and Site-Specific Transcriptional Pausing on Protein Expression Noise

Sangjin Kim<sup>1,2,3</sup> and Christine Jacobs-Wagner<sup>1,2,3,4,\*</sup>

<sup>1</sup>Microbial Sciences Institute, West Haven, Connecticut; <sup>2</sup>Department of Molecular, Cellular and Developmental Biology, Yale University, New Haven, Connecticut; <sup>3</sup>Howard Hughes Medical Institute, New Haven, Connecticut; and <sup>4</sup>Department of Microbial Pathogenesis, Yale School of Medicine, Yale University, New Haven, Connecticut

**ABSTRACT** Genetically identical cells exhibit diverse phenotypes even when experiencing the same environment. This phenomenon in part originates from cell-to-cell variability (noise) in protein expression. Although various kinetic schemes of stochastic transcription initiation are known to affect gene expression noise, how posttranscription initiation events contribute to noise at the protein level remains incompletely understood. To address this question, we developed a stochastic simulation-based model of bacterial gene expression that integrates well-known dependencies between transcription initiation, transcription elongation dynamics, mRNA degradation, and translation. We identified realistic conditions under which mRNA lifetime and transcriptional pauses modulate the protein expression noise initially introduced by the promoter architecture. For instance, we found that the short lifetime of bacterial mRNAs facilitates the production of protein bursts. Conversely, RNA polymerase (RNAP) pausing at specific sites during transcription elongation can attenuate protein bursts by fluidizing the RNAP traffic to the point of erasing the effect of a bursty promoter. Pause-prone sites, if located close to the promoter, can also affect noise indirectly by reducing both transcription and translation initiation due to RNAP and ribosome congestion. Our findings highlight how the interplay between transcription initiation, transcription elongation, translation, and mRNA degradation shapes the distribution in protein numbers. They also have implications for our understanding of gene evolution and suggest combinatorial strategies for modulating phenotypic variability by genetic engineering.

## INTRODUCTION

One of the most important tasks cells do is regulate the level of gene expression—the conversion of genetic information written in DNA into a certain amount of proteins. Interestingly, isogenic cells in the same environment produce variable amounts of mRNA and protein (1–3). Variability (noise) in mRNA and protein levels, however, varies among genes. For example, low noise is expected for genes encoding proteins that are needed in all cells, such as housekeeping proteins. Consistent with this idea, experiments in *Escherichia coli* and budding yeast have shown that genes essential for viability tend to exhibit lower noise than nonessential genes (4–7). For “noisy” genes, such as some genes involved in stress response, a large variability in protein

expression can lead to beneficial traits for the population by generating different cell phenotypes. Such a phenotypic heterogeneity is known to offer a “bet-hedging” strategy for bacterial survival in fluctuating and stressful environments (8–11). It can also be beneficial for cooperative social adaptations through “division of labor” within the cell population (12).

Multiple sources of protein expression noise exist. Intrinsic noise arises because of the stochastic nature of gene expression processes. Extrinsic noise can be produced by cell-to-cell heterogeneity in global factors, including the concentration of RNA polymerases (RNAPs) and ribosomes, cell size, and the cell cycle (13). Previous experimental and theoretical studies have identified transcription initiation (i.e., the loading of RNAP onto the promoter region) as a major source of intrinsic noise (e.g., 13–27). Specifically, if transcription initiation occurs randomly at a certain frequency, a mode known as “nonbursty” initiation, the mRNA number at steady state follows a Poisson

Submitted October 17, 2017, and accepted for publication February 7, 2018.

\*Correspondence: [christine.jacobs-wagner@yale.edu](mailto:christine.jacobs-wagner@yale.edu)

Editor: Julie Biteen.

<https://doi.org/10.1016/j.bpj.2018.02.010>

© 2018 Biophysical Society.

distribution, which characteristically shows an mRNA Fano factor (variance/mean) equal to one. In contrast, if the rate of transcription initiation varies over time, such as in pulsatile transcription from a promoter that cycles between active and inactive states, the mRNA levels become more variable among cells (mRNA Fano factors  $>1$ ). This ON/OFF model of transcription, referred to as “bursty” initiation, is supported by the observation of pulsatile transcription events in live *E. coli* cells (28) and by the grouping of RNAPs along the rRNA operon in electron micrographs (29). The mRNA Fano factors measured in *E. coli* span from 1 to  $\sim 10$ , suggesting that both nonbursty and bursty promoters may operate in vivo (5,25,26).

Cell phenotypes are generally dictated at the protein, rather than mRNA, level. Noise in protein levels is often quantified by the squared coefficient of variation ( $CV^2$ ), which is the squared standard deviation divided by the squared mean of the protein number distribution (17). Most current analytical models that calculate the noise in protein levels assume that the kinetic parameters associated with the promoter architecture are the major contributing factors in protein synthesis fluctuations and therefore ignore transcription elongation dynamics and known dependencies between transcription, translation, and mRNA degradation (18–22). Analytical models that include transcription elongation exist, but they only consider limit cases of low transcription initiation rate (30) or constant RNAP elongation speed (31,32) to neglect RNAP-RNAP interactions (RNAP congestion) during elongation. To examine RNAP traffic, modelers have turned to stochastic simulation-based models. This approach has shown that RNAP traffic caused by RNAP pauses can create mRNA and protein bursts from nonbursty promoters (33–38), highlighting the importance of considering transcription elongation dynamics when studying protein expression noise. Including transcription elongation dynamics in stochastic gene expression models requires many variables and increases the complexity of the model. For this reason, previous simulation-based models have examined special conditions, leaving out translation, mRNA degradation, and/or bursty transcription initiation (33–38).

Here we explore how various scenarios of transcription elongation dynamics and mRNA degradation affect the noise initially set by bursty and nonbursty promoters. We developed an integrative stochastic model of bacterial protein expression that includes transcription initiation, transcription elongation, mRNA degradation, and translation as well as established dependencies, such as the coupling between transcription and translation (39–41), cotranscriptional mRNA degradation (42,43), and the ribosome effect on mRNA degradation (44) (Fig. 1 A). Simulations of this model identified new regimes of posttranscription initiation dynamics that modify the protein expression noise initially set by the promoter.

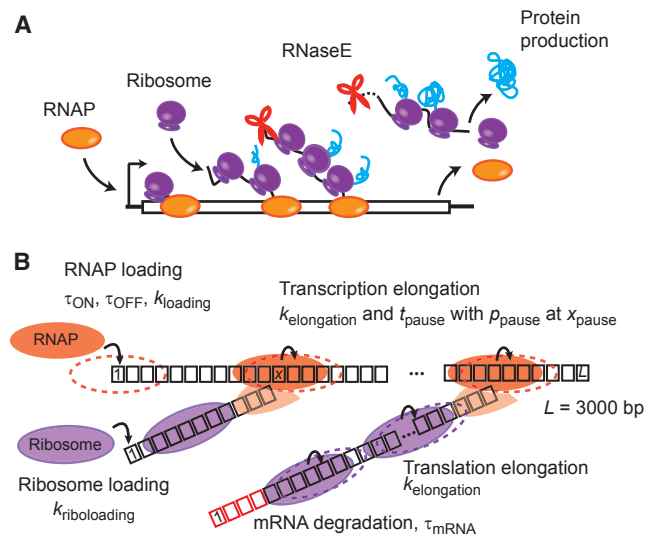

**FIGURE 1** Integrated model of gene expression. (A) This is a schematic showing the current view on the temporal coordination between transcription, translation, and mRNA degradation in *E. coli*. RNAP loads onto the promoter. Once the ribosome-binding site (RBS) is transcribed, ribosomes load and translocate. mRNA degradation by RNase E can start on the nascent mRNA. The first ribosome maintains contact with the RNAP throughout elongation. In our model, a full-length protein is produced immediately after a ribosome reaches the end of the mRNA. (B) This is a schematic showing the different steps included in our TASEP-based model of bacterial gene expression. Transcription starts at the first base pair of the template, and transcription elongation occurs by RNAP stepping along the 3000-bps template. Translation initiates at the first base of the mRNA template (considered here as the RBS), and translation elongation occurs by ribosome stepping on each nucleotide along the mRNA template. mRNA degradation starts from the 5' end of the mRNA and continues concomitant to the motion of the last ribosome on the transcript. Degraded ribonucleotides are shown in red. Input parameters of our model are indicated. To see this figure in color, go online.

## METHODS

### Modeling transcription, translation, and mRNA degradation

All steps described in this section (Fig. 1 B) were stochastically simulated using the Gillespie algorithm (45). For stochastic transcription initiation from a bursty promoter, we generated a series of time points when the promoter was ON or OFF, assuming that the ON and OFF periods follow exponential waiting time distributions with average  $\tau_{ON}$  and  $\tau_{OFF}$ , respectively. In the case of a nonbursty promoter, the promoter was assumed to be always ON. Next, we determined a series of time points for RNAP loading attempts during ON periods, assuming exponentially distributed waiting times between loading attempts (average rate  $k_{loading}$ ). Transcription elongation was modeled by stochastic 1-base pair (bp) stepping based on the totally asymmetric exclusion process (TASEP) algorithm (46–48). The DNA templates were considered as one-dimensional lattices, where each lattice site corresponded to 1 bp. The stepping rate as a function of template position was provided as an input. For pause-free elongation, we used an average speed of  $k_{elongation}$ . When appropriate, a different stepping rate (inverse of the pause duration,  $t_{pause}$ ) was assigned at a pause site ( $x_{pause}$ ) for all or a fraction of RNAPs (pausing probability,  $p_{pause}$ ). We assumed an exponential dwell time distribution at each nucleotide position based

on previous experimental observations (49–51). Steric hindrance between RNAPs was checked before each stepping, assuming an RNAP footprint of 35 bps (52). Similar to previous elongation models (33,34,53), we did not include RNAP cooperation upon collision (54) because the kinetics of this process remain unknown. We assumed transcription termination at the end of the template to be instantaneous; however, if desired, slower RNAP release can be modeled by using a slower stepping rate at the last position of the template. After RNAP trajectories were simulated, the spacing between adjacent RNAPs was calculated as time “headways” at every nucleotide position along the gene. Headway is defined as the time interval between two consecutive RNAP exit events at every nucleotide position. Mathematically, it is the subtraction of trajectories of two subsequent RNAPs at a given position ( $t_N(x) - t_{N-1}(x)$ , where  $t_N(x)$  is the trajectory of the  $N$ -th RNAP along the gene). The distribution of headways is considered as an important characteristic of traffic flow (55) and has previously been used to analyze RNAP traffic (48).

To model the coupling between transcription and translation, the first ribosome was loaded upon transcription of the first 33 nucleotides (nts). This accounts for the footprint sizes of the RNAP and ribosome, 35 bps and 30 nts, respectively (52,56). The first ribosome then moved on the nascent mRNA in concert with the RNAP to maintain contact throughout transcription elongation (39–41). Additional ribosomes were stochastically loaded based on an exponential waiting time distribution (average rate  $k_{\text{riboloading}}$ ). These ribosomes made stochastic 1-nt steps at the average speed ( $k_{\text{elongation}}$ ) to reflect the experimental evidence that the average speed of RNAP and ribosomes match (40,57). During ribosome translocation, the same steric hindrance principle used for RNAP translocation was used: ribosomes were unable to bypass each other on an mRNA, and the first ribosome was unable to bypass the transcribing RNAP on the nascent mRNA.

In our model, mRNA degradation began at the 5' end of each mRNA, assuming an exponential waiting time distribution between initial synthesis and degradation (with an average lifetime,  $\tau_{\text{mRNA}}$ ). Once the first nucleotide degraded, further ribosome loading was prevented, and the remaining nts on the mRNA were removed concomitant with the movement of the last ribosome on the transcript (58). This model is consistent with experimental observations of 5'-to-3' net directionality of mRNA degradation (42,59,60) and with the ribosome shielding effect (44). In most simulations, protein degradation was considered negligible because most bacterial proteins are very stable (61). However, in some cases, protein degradation was added to the model, assuming first-order kinetics and an average protein lifetime of  $\tau_{\text{protein}}$ , as previously done (e.g., 36). The whole gene expression process (transcription, translation, and mRNA degradation) was simulated for a total duration of 40 min. mRNA levels reached steady state within 10 min of the simulation time under the parameters we used. We performed a total of 1000 simulations for each scenario.

## Analysis of the simulated data

We counted one mRNA when the first nucleotide (5' end) was present, unless noted otherwise. To obtain steady-state distributions of mRNA numbers, we counted the number of mRNAs made but not yet degraded at  $t = 30$  min of simulation time (an arbitrary choice of time when mRNA levels were in steady state). We used this distribution to calculate the mean and Fano factor values for each mRNA distribution.

Protein number increased by one every time a ribosome reached the end of a transcript. To obtain distributions of protein numbers, we summed all proteins made from a DNA template between  $t = 20$ –30 min of simulation time, which ensures steady state in mRNA levels. This method of counting proteins is equivalent to measuring protein accumulation over a period of time. Means and  $\text{CV}^2$  of protein numbers were calculated from these distributions.

All error bars indicate an estimation of the standard error of the mean calculated by bootstrap resampling of the original sample size (1000 simulations) 3000 times.

## RESULTS

### Comparison between nonbursty and bursty promoters with similar effective transcription initiation rates

Although our integrated model of gene expression (see [Methods](#)) can be applied to any gene, we modeled the expression of the 3075-nt *lacZ* gene of *E. coli*, which is a popular model in quantitative gene expression studies. Given an average RNAP speed ( $k_{\text{elongation}}$ ) of 30 nt/s on the *lacZ* region (Fig. S1 A) (40), the input average RNAP dwell time at each base position  $x$  was  $1 \text{ nt}/k_{\text{elongation}} = 1/30 \text{ s}$ . We used the experimentally determined mean *lacZ* mRNA lifetime of 90 s (Fig. S1 B) as the first-order rate constant for 5'-end degradation ( $\tau_{\text{mRNA}}$ ). For transcription initiation, we varied the RNAP loading rate on the DNA template to achieve a range of expression levels seen in experiments (25). For translation initiation, we used an experimentally-derived average rate of ribosome loading ( $k_{\text{riboloading}}$ ) of  $0.2 \text{ s}^{-1}$  (62,63).

To build on previously known promoter properties, we considered two different types of promoters: nonbursty and bursty. Although the *lac* promoter is thought to be bursty (25,64), we also considered nonbursty conditions for comparison and to expand our approach to other promoters. The complex, multistep kinetics of transcription initiation (65,66) was approximated as one rate-limiting step, as previously done (e.g., 25,26). Transcription initiation from nonbursty promoters was modeled as a Poisson process with an RNAP loading rate,  $k_{\text{loading}}$ , which is the inverse of the loading interval,  $\tau_{\text{loading}}$  (Fig. 2 A). This parameter was varied to obtain an output RNAP loading interval between 3 and 500 s, reflecting the decreasing strength of a constitutive promoter. For the bursty case, the promoters cycled between ON and OFF states, with rate constants  $k_{\text{ON}}$  (rate of switching from OFF to ON state,  $1/\tau_{\text{OFF}}$ ) and  $k_{\text{OFF}}$  (rate of switching from ON to OFF state,  $1/\tau_{\text{ON}}$ ). RNAPs were loaded only during the ON state at an interval of  $\tau_{\text{loading}}$  (RNAP loading interval during the ON state) (Fig. 2 A) (22–25). This model resulted in multiple RNAP loading events clustered in time in a pulsatile manner. We used experimentally derived  $\tau_{\text{OFF}} = 143 \text{ s}$  and  $\tau_{\text{loading}} = 2.2 \text{ s}$  (25), and varied the fraction of time spent in the ON state ( $f_{\text{ON}} = \tau_{\text{ON}}/(\tau_{\text{ON}} + \tau_{\text{OFF}})$ ) from 0.005 to 0.99 to achieve an output average RNAP loading intervals between 3 and 500 s.

When we compared nonbursty and bursty promoters of similar strength (i.e., yielding similar effective transcription initiation rates and numbers of mRNAs at steady state), we found expected differences at intermediate RNAP loading

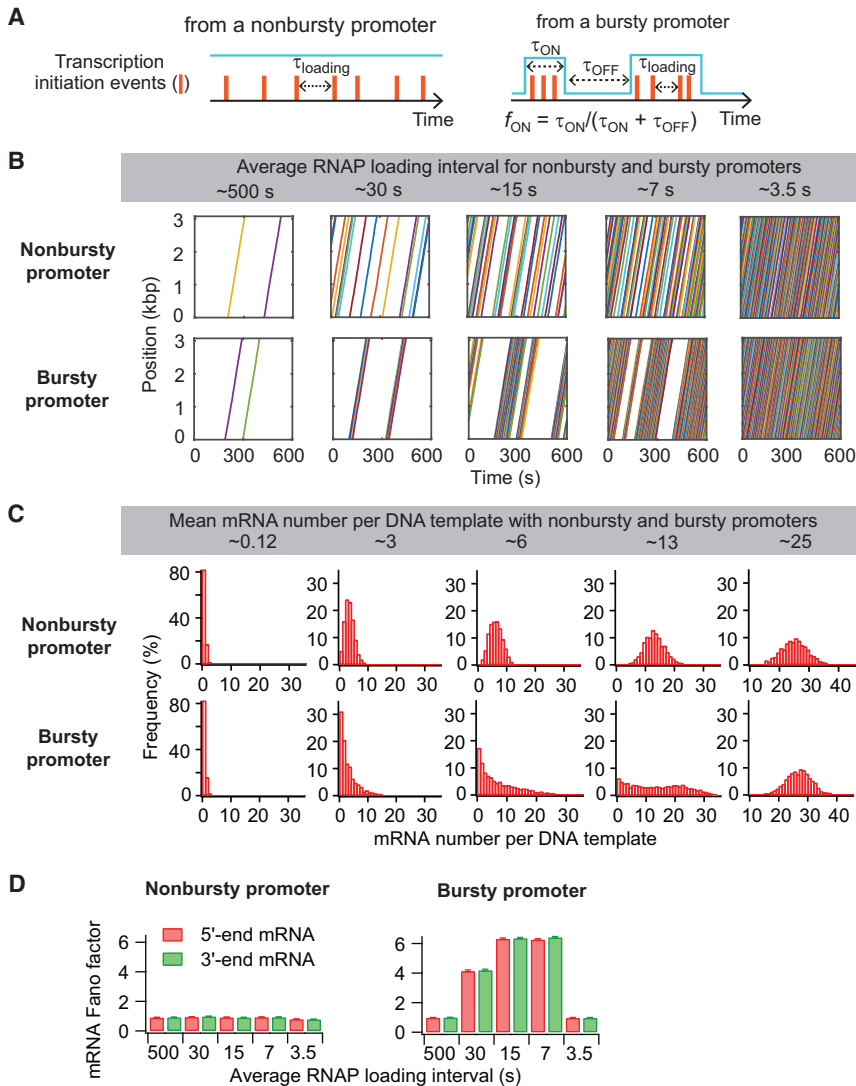

**FIGURE 2** Effect of nonbursty and bursty promoters on RNAP traffic and mRNA number distribution. (A) These are schematics for two modes of transcription initiation. The promoter states are shown in cyan, and RNAP loading events are represented by orange bars. (B) These are example trajectories of RNAP loading and translocating on individual DNA templates over 10 min based on different transcription initiation conditions: for nonbursty transcription initiation, the input  $\tau_{\text{loading}}$  was varied as 500, 30, 15, 6, 2.5 s (from left to right); for bursty transcription initiation,  $f_{\text{ON}}$  was varied as 0.005, 0.1, 0.25, 0.5, 0.99 (from left to right). The average loading interval (gray box) was calculated from the simulation model output. (C) Shown are steady-state distributions of mRNA numbers per DNA template under the transcription initiation conditions used in (B). mRNAs were counted based on the presence of the first base. See Fig. S2 B for the results using an mRNA counting method that better reflects how mRNAs are often quantified in fluorescence in situ hybridization experiments. (D) Fano factors calculated for the 5' and 3' ends of the mRNAs under the various transcription initiation conditions used in (B) and (C). To see this figure in color, go online.

intervals (e.g., 7, 15, and 30 s in Fig. 2, B–D). First, bursty promoters showed pronounced bursts of RNAP loading events followed by notable OFF periods, resulting in temporal profiles of RNAP trajectories that were very different from those obtained from a nonbursty promoter of similar strength (Fig. 2 B). Second, the distribution of RNAPs on the DNA templates was wider for bursty promoters than for nonbursty promoters, with a noticeable peak close to zero due to the stochastic occurrence of OFF and ON states (Fig. S2 A). Third, the steady-state distributions of mRNA numbers for bursty initiations were broader, despite having similar mean mRNA numbers (Figs. 2 C and S2 B). Fourth, the distribution of “headways,” which is defined by the time interval between two adjacent RNAPs passing a given DNA position (55), appeared largely exponential for nonbursty promoters (Fig. S2 C). In contrast, RNAPs from bursty promoters displayed either small headways arising from loading events within an ON period, or

large headways arising from loading events separated by an OFF period (Fig. S2 C).

In both promoter cases, the headway set at transcription initiation was conserved until the end of transcription, as shown by the near-perfect overlap in distributions between headways at initiation and termination (Fig. S2 C). The conservation of the promoter-dependent “burstiness” until the end of transcription elongation was also shown by comparing the Fano factors calculated from the 5' and 3' ends of the mRNA. For both promoter types, the 3'-end mRNA Fano factor remained the same as the 5'-end mRNA Fano factor (one for nonbursty promoters and greater than one for bursty promoters) (Fig. 2 D). Although a previous modeling study (34) suggested that RNAP bursts set by a bursty promoter can completely disappear during transcription elongation (i.e., 3'-end mRNA Fano factor = 1), we found that such a phenomenon appears when 1) RNAPs are loaded back-to-back during the ON



period and 2) the RNAP footprint size is modeled as 1 bp (as in 34) instead of 35 bps (Fig. S3). With the smaller RNAP size, many RNAPs load back-to-back during a given ON period, augmenting RNAP congestion and headway separation due to extensive interactions (Fig. S4). We expect that, under realistic parameter values, the memory of a bursty promoter's ON/OFF switch is largely maintained throughout transcription elongation, at least in the absence of RNAP pauses.

At transcription initiation frequencies that were either very low or very high (e.g., average loading interval  $\approx 500$  s or 3.5 s), bursty promoters were virtually indistinguishable from nonbursty promoters (Figs. 2, B–D and S2). At very low initiation frequencies, the ON period was too short to accommodate enough RNAP loading events to exhibit transcriptional bursts. This is consistent with the experimentally determined mRNA Fano factor of 1 for the repressed *lacZ* promoter (25). At very high initiation frequencies, the OFF period was so short that it became negligible (3). These results suggest that transcriptional bursts are unlikely for genes at either side of the expression spectrum.

Importantly, our simulations identified a dynamic range of transcription initiation rates for which our model produced a clear difference between nonbursty and bursty promoters (Figs. 2 and S2). When we examined protein production under this range of transcription initiation rates, the temporal profile of protein production was largely dictated by the temporal profile of RNAP loading onto the promoter. Nonbursty transcription initiations yielded a relatively constant number of proteins made from a DNA template over time (Fig. 3 A). In contrast, bursty transcription initiations resulted in bursty protein productions, showing periods of time without any new protein production from the DNA template (Fig. 3 A). As a result, bursty promoters produced the expected broader protein number distribution in comparison to nonbursty promoters, despite having the same mean protein production (Fig. 3 B). We also verified that the noise in protein levels increased with increasing RNAP loading intervals (i.e., decreasing transcription initiation rates) from both promoter types (Fig. S5 A), consistent with analytical models (18–22).

### Short mRNA lifetimes facilitate production of protein bursts

Once we had established parameter conditions that clearly distinguish bursty and nonbursty transcription initiations, our goal was to examine how posttranscription initiation processes may affect the burstiness (or lack thereof) set by the promoter. First, we considered mRNA degradation. Although the lifetime of the mRNA is known to impact the amount of protein produced (the mean), its effect on the noise in protein levels ( $CV^2$ ) is less clear. If both the mRNA lifetime and the transcription initiation rate were

changed to maintain the same average protein level, the change in transcription initiation is the dominant factor affecting noise (Fig. S5 B), which is consistent with a previous report (37). But does the  $CV^2$  vary when the mRNA lifetime changes independently of the transcription initiation rate? When we applied analytical solutions that consider mRNA degradation, we found that they give different answers; some (19,20) predict a negative effect, whereas others (21,22) predict no effect (Fig. S6, A and B).

Simulations of our model showed that the observation of a bursty promoter leading to bursty protein production (Fig. 3 A) was dependent on the use of a 90-s mRNA lifetime. When the lifetime of the mRNA was increased without changing other parameters, protein bursts generated from bursty promoters became less apparent, as illustrated with a 10-min mRNA lifetime (Fig. 3 C). Although bursty promoters still produced broader protein number distributions than nonbursty promoters (Fig. 3 D), the  $CV^2$  from both types of promoters was reduced by the increase in mRNA lifetime (Fig. 3 E). In both cases, the reduction in protein expression noise was correlated with an overall attenuation of temporal fluctuations of protein synthesis, as evidenced by the virtual disappearance of periods of no protein production (Fig. 3 F).

We reasoned that the reduced temporal fluctuations of protein synthesis stemmed from the mRNA lifetime being much longer than the RNAP loading interval, resulting in increased protein production between transcription events. Consistent with this idea, the noise in protein expression for both nonbursty and bursty promoters increased either by shortening the mRNA lifetime for a given average RNAP loading interval or by increasing the average RNAP loading interval for a given mRNA lifetime (Fig. 4, A and B). In these simulations, protein degradation was neglected because most bacterial proteins are long-lived (61). However, we obtained similar trends when we included protein degradation in our model and simulated an arbitrary average protein lifetime of 20 min (Fig. S6, C and D).

When the mRNA lifetime was much smaller than the average RNAP loading interval (e.g., 90 s vs. 500 s), a nonbursty promoter was able to produce protein bursts (Fig. 4, C and D), resulting in higher protein production noise ( $CV^2$ ) than when the mRNA lifetime was longer than the average RNAP loading interval (e.g., 90 s vs. 15 s) (Fig. 4 E). This is consistent with *in vivo* observations that occasional firing of the repressed *lac* promoter (average RNAP loading interval of 40–150 min under the experimental condition used in the cited studies) causes spikes of protein production (62,67). This is because each mRNA is degraded before the next one is made, resulting in well-separated bursts of protein production.

These results suggest that short mRNA lifetimes (in the minute time scale), a common characteristic of bacterial

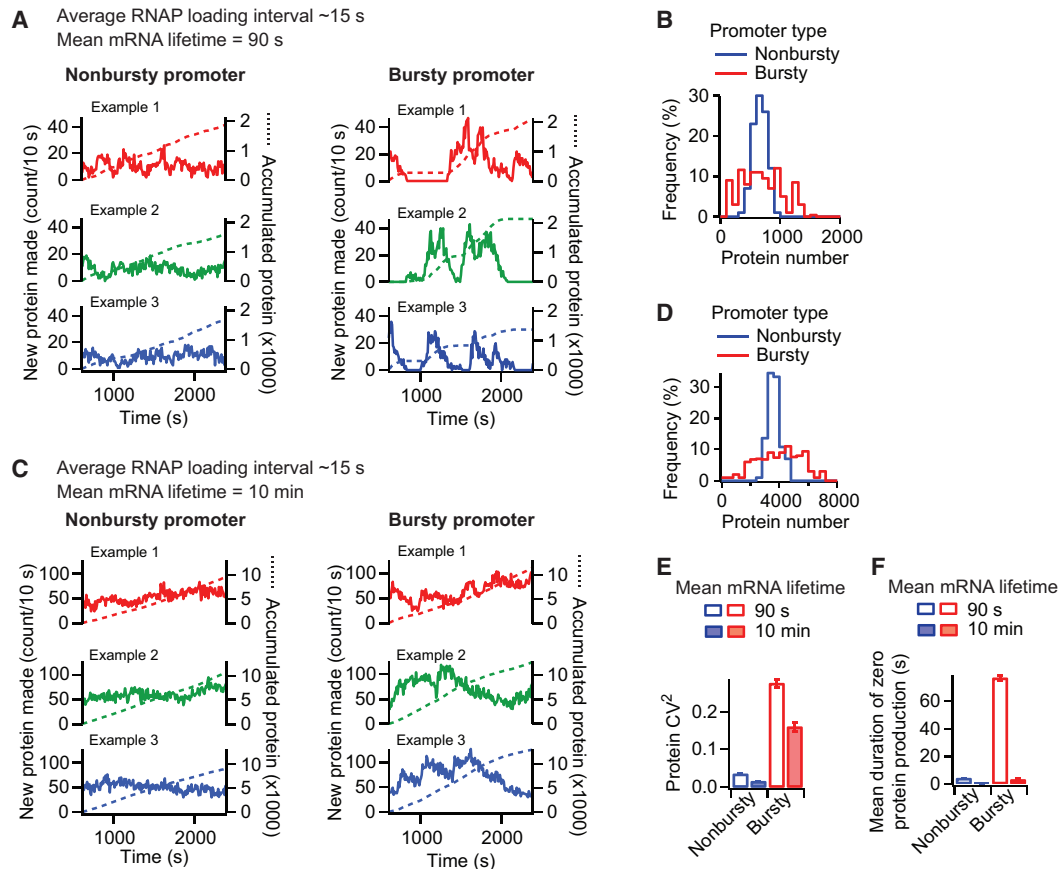

**FIGURE 3** Bursty promoters result in bursty protein synthesis and greater noise in protein levels when the mRNA lifetime is short. (A) These are temporal profiles of protein production. The number of new proteins made per DNA template was quantified every 10 s. Example trajectories were from three independent simulations for nonbursty and bursty promoters with average RNAP loading intervals of  $\sim 15$  s. The mean mRNA lifetime was 90 s. The number of proteins accumulated from expression of the DNA template is shown in dotted lines. Only the accumulation of proteins occurring within the time frame was calculated. (B) Shown are distributions of the number of proteins made per DNA template over 10 min. (C) Shown are temporal profiles of protein production under the same conditions as in (A), except that the mRNA lifetime was 10 min. (D) Shown are distributions of the number of proteins made per DNA template over 10 min when the mRNA lifetime was 10 min. (E) Shown is the variability in protein numbers for a nonbursty and bursty promoter, depending on the mRNA lifetime. (F) Shown are mean durations of zero protein production in the temporal profiles shown in (A) and (C). To see this figure in color, go online.

mRNAs (42,59,68), facilitate bursty protein synthesis and increase the variability in protein levels across the population for both bursty and nonbursty promoters.

### Sequence-dependent pauses can attenuate RNAP bursts and reduce protein expression noise

So far, our simulations considered pause-free elongation. In *in vitro* experiments, RNAPs can pause seemingly at random along the DNA template (49,69,70). Modeling studies have shown that long stochastic (sequence-independent) pauses can produce RNAP bursts from nonbursty promoters, because RNAPs can pile up behind the paused RNAP and form a convoy that travels together once the pause ends (33–36). RNAPs are also known to pause at specific DNA sites for durations that generally range from seconds to  $\sim 1$  min (49,51,71–80). Pause sites are common in *E. coli* based on RNAP profiling experiments (81,82). Previ-

ous modeling work has shown that sequence-dependent pauses of 100 or 500 s generate protein bursts from nonbursty promoters due to ribosome piling up behind the paused RNAP (37). However, such long-lived RNAP pauses are expected to be rare, and it is unclear whether shorter pauses at specific DNA sites can still affect the noise in protein levels. Furthermore, to our knowledge, the role of sequence-dependent RNAP pauses has only been reported in the case of nonbursty promoters. Whether pause-prone sites affect gene expression noise from bursty promoters is unknown.

In our model of sequence-dependent pausing, RNAPs resided at each nucleotide on average for  $1/30$  s as before except at the pause site ( $x_{\text{pause}}$ ), where we varied the average RNAP dwell ( $t_{\text{pause}}$ ). The probability of a pause at the particular site ( $p_{\text{pause}}$ ) was also considered, such that if a pause occurred, the dwell time was randomly chosen from an exponential distribution with a mean dwell time

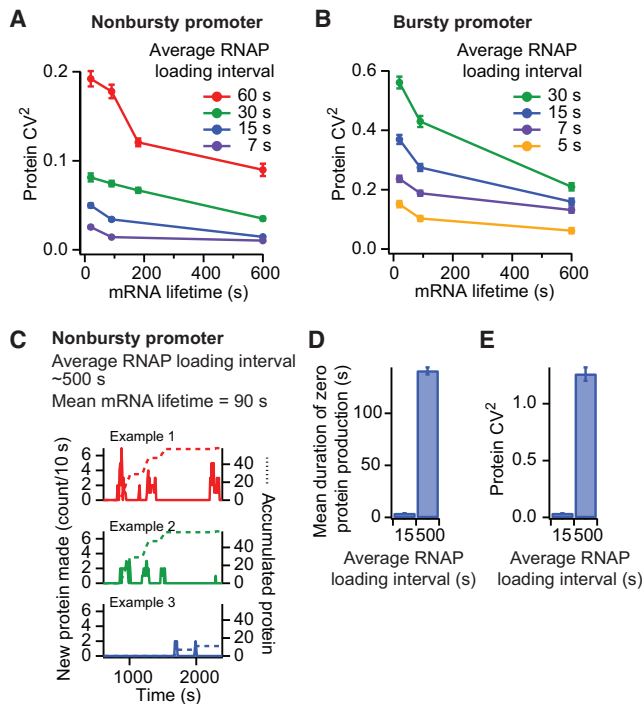

FIGURE 4 Temporal fluctuations in protein production and variability in protein numbers are modulated by the RNAP loading interval and the mRNA lifetime. (A and B) Shown is the variability in protein numbers as a function of mRNA lifetimes and RNAP loading intervals from nonbursty (A) and bursty (B) promoters. (C) Shown are example temporal profiles of protein production from a nonbursty promoter with an average RNAP loading interval of 500 s, which is much longer than the 90-s mRNA lifetime. (D) Shown are mean durations of zero protein production calculated from the temporal profiles of protein production shown in (C) and Fig. 3 A. (E) Shown is the variability in protein numbers for the conditions described in (D). To see this figure in color, go online.

of  $t_{\text{pause}}$  (49–51). For illustration purposes, we modeled a single pause site in a 3-kbp gene, driven by either a nonbursty or bursty promoter with an average RNAP loading interval of  $\sim 15$  s. Even at  $p_{\text{pause}} = 100\%$ , pauses shorter than the RNAP loading interval, such as  $t_{\text{pause}} = 1$  s, had a negligible effect on RNAP traffic regardless of the promoter type, as shown by the near-perfectly overlapping distributions of  $\Delta\text{headways}$  (the difference between the headway at the end of elongation and the headway at the start for two consecutive RNAPs) between the 1-s pause and the no-pause cases (Fig. S7).

When the pause was similar to (e.g.,  $t_{\text{pause}} = 10$  s) or longer than the RNAP loading intervals and the probability of pausing was high (e.g.,  $p_{\text{pause}} \sim 80\%$ , as for the *his* and *ops* pauses (51,76,79)), the pause resulted in two effects on RNAP traffic: 1) RNAP piling upstream of the pause site and 2) a change in RNAP headway downstream of the pause. In the case of a nonbursty initiation, these effects (Fig. 5 A) resulted in a broader distribution of  $\Delta\text{headways}$  between subsequent RNAPs, but the  $\Delta\text{headway}$  distribution remained centered around zero, with no net change (Fig. 5 B). The nonbursty conditions remained until the

end of the template because the headway between subsequent RNAPs either increased or decreased with similar probabilities. As a consequence, the Fano factor was maintained at  $\sim 1$  at both the 5' and 3' ends of the mRNA (Fig. 5 C), and the noise in protein levels ( $\text{CV}^2$ ) was not affected (Fig. 5 D). Unlike a 100-s pause (37), a 10-s pause did not provide sufficient time for ribosomes to pile up behind the paused RNAP to create substantial protein bursts (Fig. S8). In the case of bursty promoters, the frequent back-to-back loading of RNAPs (i.e., small initial headway) caused the majority of RNAPs to catch up with each other at the pause site (Fig. 5 E). As most RNAPs in the pile will also stop at the pause site, they will resume traveling with a new headway dictated by the pause duration. As a result, the headway between RNAPs showed a net increase after the pause site (Fig. 5 F). This situation is analogous to car traffic near a tollbooth. The congested traffic before the tollbooth becomes fluid after the cars stop for the toll. The pause-dependent increase in headway led initial RNAP clusters to largely dissipate into a nonbursty-like situation after the pause, as seen in the example RNAP trajectories (Fig. 5 E) and in the large decrease in mRNA Fano factor between 5' and 3' ends (Fig. 5 G). In other words, pauses similar to or longer than RNAP loading intervals diminished the effect from the bursty promoter's ON/OFF switch by increasing the RNAP headway after the pause. This memory loss of initial conditions lowered protein expression noise (Fig. 5 H) by smoothing the temporal profile of protein production (Fig. 5 I). Pauses also resulted in a noise-attenuating effect when we considered protein degradation (see Fig. S9 for a protein lifetime of 20 min).

When we examined the effect of imposing two pause sites ( $t_{\text{pause}} = 10$  s,  $p_{\text{pause}} = 100\%$  and  $x_{\text{pause}} = 1500$  and 2500 bp) on a gene driven by a bursty promoter, we found that the second pause did not affect the RNAP headway as much as the first pause (Fig. S10, scenarios (ii) vs. (i)). We reasoned that the headway increase generated by the first pause reduced the number of RNAPs that pile up at the second pause site. However, when the second pause was longer than the first (e.g.,  $t_{\text{pause}} = 10$  and 15 s, respectively), it further increased RNAP headways (Fig. S10, scenarios (iii) vs. (i)), suggesting that multiple long-lived pauses can have additive effects on RNAP traffic.

## DISCUSSION

In this study, we highlight the role of posttranscription initiation processes, such as mRNA degradation and RNAP pausing, in altering the intrinsic noise in protein expression dictated at transcription initiation by the promoter.

Although the lifetime of mRNA is well known to alter the amount of proteins produced, its potential effect on protein noise was less clear based on previous theoretical studies

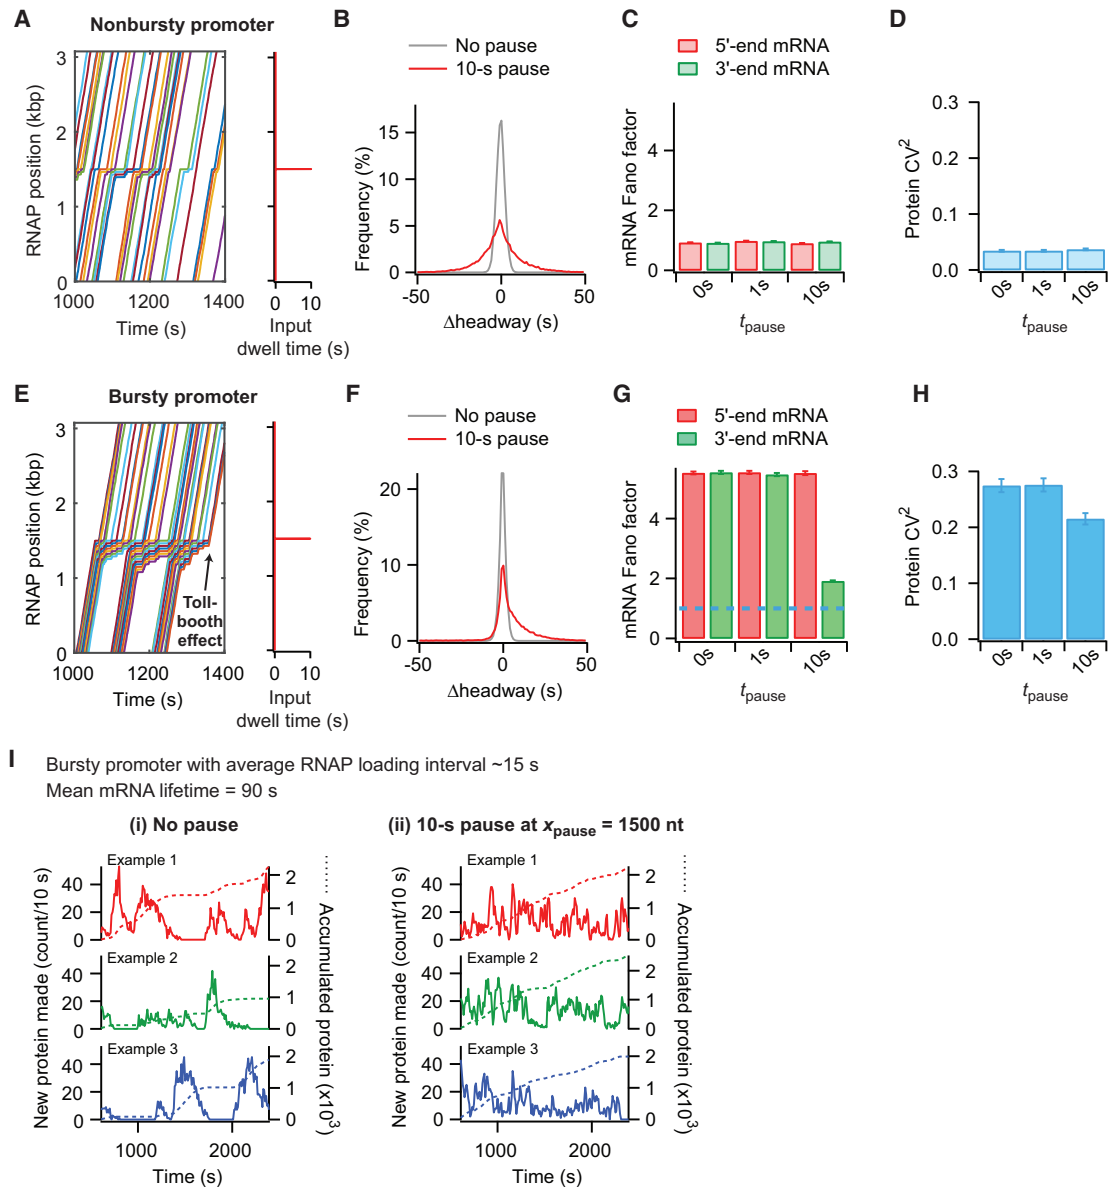

**FIGURE 5** Sequence-dependent RNAP pauses affect gene expression dynamics and steady-state distributions of mRNA and protein numbers. (A) Shown are example trajectories of RNAPs along a DNA template from a simulation with a pause duration  $t_{\text{pause}} = 10$  s at  $x_{\text{pause}} = 1500$  nt with  $p_{\text{pause}} = 80\%$  for a nonbursty promoter with average RNAP loading interval of  $\sim 15$  s. (B) Shown are distributions of  $\Delta$ headways for all simulated RNAPs using the same conditions as in (A) compared to the no-pause case. (C) Shown are Fano factors calculated based on either the 5' or 3' end of the mRNA, considering three different pause conditions for the nonbursty promoter: no pause (0 s), 1-s pause at  $x_{\text{pause}} = 1500$  nt with  $p_{\text{pause}} = 100\%$ , and 10-s pause at  $x_{\text{pause}} = 1500$  nt with  $p_{\text{pause}} = 80\%$ . (D) Variability in protein numbers ( $CV^2$ ) of the nonbursty promoter, considering three different pause conditions as in (C). (E) Shown are example trajectories of RNAPs along a DNA template with the same pause condition as in (A) but with a bursty promoter and an average RNAP loading interval of  $\sim 15$  s. (F) Shown are distributions of  $\Delta$ headways from all simulated RNAPs using the same conditions as in (E) compared to the no-pause case. (G) 5'- and 3'-end mRNA Fano factors for the bursty promoter with different pause conditions, as used in (C) are shown. The blue dotted line denotes a Fano factor equal to one, representing a nonbursty process. (H) Variability in protein numbers ( $CV^2$ ) for the bursty promoter, considering three different pause conditions as used in (C). (I) Shown is the effect of a pause on temporal fluctuations in protein production from a bursty promoter with an average RNAP loading interval of  $\sim 15$  s. Although the temporal profiles of protein production in the absence of a pause show bursty protein production (left), those in the presence of a 10-s pause at  $x_{\text{pause}} = 1500$  nt with  $p_{\text{pause}} = 80\%$  show a reduction in bursty protein production. In particular, the pause smoothens the temporal profile of protein accumulation (dotted lines). To see this figure in color, go online.

(Fig. S6, A and B). We found that mRNA lifetimes longer than the OFF period of a bursty promoter dampen the temporal fluctuations of protein synthesis (Fig. 3 A vs. Fig. 3 C). Because one mRNA typically generates more than one pro-

tein, longer mRNA lifetime reduces the effect of the bursty promoter's ON/OFF switch (Fig. 4 B). mRNA expression from nonbursty promoters also fluctuates over time due to the stochastic nature of transcription initiation. Hence, the



mRNA lifetime also smooths temporal fluctuations of protein production in the case of nonbursty promoters (Figs. 3 C and 4 A). Altogether, this suggests that mRNA degradation is a factor to consider when studying noise in gene expression, especially given that the lifetimes of bacterial mRNAs can vary over an order of magnitude (42,59,68).

RNAP pausing is another important posttranscription initiation event that can affect noise. So far, pauses have been viewed as noise-generating factors (33–38). Our work suggests that RNAP pauses can also attenuate noise by modulating RNAP traffic downstream of the pause (Fig. 5, E–I). The RNAP headway, which shapes the temporal fluctuations in mRNA and protein production, can be altered by a pause (Fig. 5, E and F) to the point that the memory of a bursty promoter's ON/OFF switch can be lost after the pause site (Fig. 5 G).

Whether transcriptional pausing attenuates or generates mRNA and protein bursts depends on the probability of RNAPs to stop at a particular DNA site. If an RNAP pause occurs stochastically at a random position along the gene (i.e., low probability of pausing at any given position), it can create a line of RNAPs behind the pause that travels as a convoy when the pause ends (33–36). This is akin to a traffic light situation in which all cars stopped at a red light move together when the light turns green. The size of the RNAP convoy, which dictates the size of mRNA and protein bursts, increases with the duration of the pause, the RNAP loading rate and the RNAP translocation speed. A similar noise-generating effect on RNAP traffic is expected if a low-probability pause occurs at a specific DNA sequence (36,38). However, if a pause has a high probability of occurring, it has an opposite noise-attenuating effect. Here, as mentioned before, the traffic analogy is with a tollbooth where all cars must stop, one by one, before resuming travel with a new headway. Similarly, RNAPs accumulated behind the pause have to stop at the pause site before being released one RNAP at a time (Fig. 5 E). Emergence from the pause site results in more fluid traffic, diminishing any promoter-induced noise effects (Fig. 5, G and H).

In vitro single-molecule experiments have shown that the probability of an RNAP pause at a given location correlates with its duration (51). Therefore, sequences that generate pauses long enough to alter RNAP traffic are likely to be efficient at pausing RNAPs, favoring the “tollbooth” noise-attenuating mechanism that we report. That said, low-probability pauses that are long-lived are also likely to occur inside cells. For instance, in *E. coli*, RNAPs occasionally retain the initiation sigma factor,  $\sigma^{70}$  during elongation (83–93), and these  $\sigma^{70}$ -associated RNAPs can pause at promoter-like sequences within genes for very long periods of time (minutes) (85,88,91,92,94). Since a minority of the RNAPs retain  $\sigma^{70}$  after initiation (83–92), only a fraction of the RNAP population will pause, effectively triggering the “traffic-light” noise-generating mechanism described above (Fig. S11). Furthermore, because of the coupling between

transcription and translation in bacteria, these long-lived RNAP pauses may also affect the traffic of ribosomes, resulting in sharper protein bursts (Fig. S11).

Location is yet another important pause property to consider. In the *E. coli* genome, RNAP pause sites are often located near promoters (81,83,85,86,91,95). RNAP piling behind the pause site may extend to the promoter and prevent the loading of additional RNAPs (53,95–97). Since the transcription initiation rate inversely scales with  $CV^2$  (Fig. 4, A and B) (15,16,19), this promoter blockage can indirectly increase noise (Fig. S12, A and B). Furthermore, RNAP stalling near the promoter can also result in reduced translation initiation rates (Fig. S12 C) when ribosomes piling on the nascent transcript reach and block the ribosome-binding site (RBS) (Fig. S12 D). This second effect on protein expression rate stems from the temporal coupling between transcription and translation in bacteria.

Thus, transcriptional pausing can create opposite effects on noise depending on the pause probability, duration, and location. Interestingly, the longevity of a pause site in a *Salmonella* magnesium transporter gene has been shown to change in response to varying concentrations of magnesium (79). This example raises the possibility of environmental regulation of noise by modulating pause duration. Overall, our study stresses the importance of a comprehensive model of gene expression when estimating noise, including for the analysis of genome-wide trends in gene expression noise (3) since promoter architectures and pause properties vary among genes.

As congested traffic dynamics of RNAPs and ribosomes have yet to be solved analytically, a simulation-based model such as ours provides a convenient tool for testing different scenarios and for estimating the combinatorial effect of noise modulators. For this purpose, we provide our MATLAB-based simulation code and detailed guidelines in the [Supporting Materials and Methods](#). Simulations generate mRNA and protein distributions, as well as RNAP and ribosome traffic dynamics. Although we tested the model using the  $\tau_{ON}$ ,  $\tau_{OFF}$ , and  $\tau_{loading}$  parameter values reported for the *lacZ* promoter, our model is generalizable and can be extended to genes with different promoter architectures by simply varying  $\tau_{ON}$ ,  $\tau_{OFF}$ , and  $\tau_{loading}$ . A limitation of our current model is that it does not include processes, such as physical “pushing” between RNAPs (54) and potential premature termination of transcription and translation at RNAP- and ribosome-congested sites (98,99), which may mitigate pause-dependent effects on protein expression noise. Determining the kinetic parameters of these processes will facilitate their integration in future models.

mRNA lifetimes and RNAP pauses are evolvable features at the gene-specific level because they are sequence-dependent and can change through mutations. Our work predicts that mutations altering pause conditions (e.g., duration and

probability) or mRNA lifetime (e.g., by altering mRNA secondary structure at the 5'-untranslated region) will affect protein expression noise at the level of individual genes. Our work also suggests possible ways by which protein expression noise may change globally. For example, mutations that render RNAP less prone to pausing (e.g., *rpoB5101* mutation in *E. coli* (76)) are expected to affect the protein expression noise of pause-sensitive genes.

In summary, by comparing bursty and nonbursty transcription initiations under a variety of scenarios, we highlight conditions under which bursty promoters produce nonbursty protein production and nonbursty promoters generate bursty protein profiles. These findings underscore the combinatorial origin of protein expression noise. Noise-modulating factors can have opposite effects depending on parameter conditions. The combinatorial effect of these factors may affect how genome sequences evolve by modulating phenotypic variability within a population. Combinatorial approaches could also be exploited for genetic engineering in synthetic biology. For instance, our findings suggest conditions to maximize protein expression noise and phenotypic diversity: a bursty promoter, a short mRNA lifetime, and an absence of long RNAP pauses. The opposite conditions are expected to minimize phenotypic heterogeneity.

## SUPPORTING MATERIAL

Supporting Materials and Methods, 12 figures, and one table are available at [http://www.biophysj.org/biophysj/supplemental/S0006-3495\(18\)30213-3](http://www.biophysj.org/biophysj/supplemental/S0006-3495(18)30213-3).

## AUTHOR CONTRIBUTIONS

C.J.-W. and S.K. designed the study, wrote the manuscript, and analyzed the data. S.K. performed the experiments and modeling. C.J.-W. supervised the project.

## ACKNOWLEDGMENTS

We thank Bruno Beltran and Drs. Damon Clark, Thierry Emonet, and Alvaro Sanchez for helpful discussions. We also thank the members of the Jacobs-Wagner Laboratory for discussions and for critical reading of the manuscript. C.J.-W. is an investigator of the Howard Hughes Medical Institute.

## SUPPORTING CITATIONS

References (100–103) appear in the [Supporting Material](#).

## REFERENCES

- Raj, A., and A. van Oudenaarden. 2008. Nature, nurture, or chance: stochastic gene expression and its consequences. *Cell*. 135:216–226.
- Eldar, A., and M. B. Elowitz. 2010. Functional roles for noise in genetic circuits. *Nature*. 467:167–173.
- Sanchez, A., and I. Golding. 2013. Genetic determinants and cellular constraints in noisy gene expression. *Science*. 342:1188–1193.
- Newman, J. R. S., S. Ghaemmaghani, ..., J. S. Weissman. 2006. Single-cell proteomic analysis of *S. cerevisiae* reveals the architecture of biological noise. *Nature*. 441:840–846.
- Taniguchi, Y., P. J. Choi, ..., X. S. Xie. 2010. Quantifying *E. coli* proteome and transcriptome with single-molecule sensitivity in single cells. *Science*. 329:533–538.
- Silander, O. K., N. Nikolic, ..., M. Ackermann. 2012. A genome-wide analysis of promoter-mediated phenotypic noise in *Escherichia coli*. *PLoS Genet*. 8:e1002443.
- Bar-Even, A., J. Paulsson, ..., N. Barkai. 2006. Noise in protein expression scales with natural protein abundance. *Nat. Genet*. 38:636–643.
- Balaban, N. Q., J. Merrin, ..., S. Leibler. 2004. Bacterial persistence as a phenotypic switch. *Science*. 305:1622–1625.
- Veening, J.-W., W. K. Smits, and O. P. Kuipers. 2008. Bistability, epigenetics, and bet-hedging in bacteria. *Annu. Rev. Microbiol*. 62:193–210.
- Thattai, M., and A. van Oudenaarden. 2004. Stochastic gene expression in fluctuating environments. *Genetics*. 167:523–530.
- Kussell, E., and S. Leibler. 2005. Phenotypic diversity, population growth, and information in fluctuating environments. *Science*. 309:2075–2078.
- West, S. A., and G. A. Cooper. 2016. Division of labour in microorganisms: an evolutionary perspective. *Nat. Rev. Microbiol*. 14:716–723.
- Elowitz, M. B., A. J. Levine, ..., P. S. Swain. 2002. Stochastic gene expression in a single cell. *Science*. 297:1183–1186.
- Kepler, T. B., and T. C. Elston. 2001. Stochasticity in transcriptional regulation: origins, consequences, and mathematical representations. *Biophys. J*. 81:3116–3136.
- Ozbudak, E. M., M. Thattai, ..., A. van Oudenaarden. 2002. Regulation of noise in the expression of a single gene. *Nat. Genet*. 31:69–73.
- Raser, J. M., and E. K. O'Shea. 2004. Control of stochasticity in eukaryotic gene expression. *Science*. 304:1811–1814.
- Paulsson, J. 2004. Summing up the noise in gene networks. *Nature*. 427:415–418.
- Paulsson, J. 2005. Models of stochastic gene expression. *Phys. Life Rev*. 2:157–175.
- Thattai, M., and A. van Oudenaarden. 2001. Intrinsic noise in gene regulatory networks. *Proc. Natl. Acad. Sci. USA*. 98:8614–8619.
- Singh, A., B. S. Razooky, ..., L. S. Weinberger. 2012. Dynamics of protein noise can distinguish between alternate sources of gene-expression variability. *Mol. Syst. Biol*. 8:607.
- Friedman, N., L. Cai, and X. S. Xie. 2006. Linking stochastic dynamics to population distribution: an analytical framework of gene expression. *Phys. Rev. Lett*. 97:168302.
- Shahrezaei, V., and P. S. Swain. 2008. Analytical distributions for stochastic gene expression. *Proc. Natl. Acad. Sci. USA*. 105:17256–17261.
- Raj, A., C. S. Peskin, ..., S. Tyagi. 2006. Stochastic mRNA synthesis in mammalian cells. *PLoS Biol*. 4:e309.
- Peccoud, J., and B. Ycart. 1995. Markovian modeling of gene-product synthesis. *Theor. Popul. Biol*. 48:222–234.
- So, L. H., A. Ghosh, ..., I. Golding. 2011. General properties of transcriptional time series in *Escherichia coli*. *Nat. Genet*. 43:554–560.
- Jones, D. L., R. C. Brewster, and R. Phillips. 2014. Promoter architecture dictates cell-to-cell variability in gene expression. *Science*. 346:1533–1536.
- Sanchez, A., H. G. Garcia, ..., J. Kondev. 2011. Effect of promoter architecture on the cell-to-cell variability in gene expression. *PLoS Comput. Biol*. 7:e1001100.
- Golding, I., J. Paulsson, ..., E. C. Cox. 2005. Real-time kinetics of gene activity in individual bacteria. *Cell*. 123:1025–1036.

29. Voulgaris, J., S. French, ..., C. L. Squires. 1999. Increased *rrn* gene dosage causes intermittent transcription of rRNA in *Escherichia coli*. *J. Bacteriol.* 181:4170–4175.
30. Choubey, S., J. Kondev, and A. Sanchez. 2015. Deciphering transcriptional dynamics in vivo by counting nascent RNA molecules. *PLoS Comput. Biol.* 11:e1004345.
31. Xu, H., S. O. Skinner, ..., I. Golding. 2016. Stochastic kinetics of nascent RNA. *Phys. Rev. Lett.* 117:128101.
32. Zenklusen, D., D. R. Larson, and R. H. Singer. 2008. Single-RNA counting reveals alternative modes of gene expression in yeast. *Nat. Struct. Mol. Biol.* 15:1263–1271.
33. Voliotis, M., N. Cohen, ..., T. B. Liverpool. 2008. Fluctuations, pauses, and backtracking in DNA transcription. *Biophys. J.* 94:334–348.
34. Dobrzyński, M., and F. J. Bruggeman. 2009. Elongation dynamics shape bursty transcription and translation. *Proc. Natl. Acad. Sci. USA.* 106:2583–2588.
35. Fujita, K., M. Iwaki, and T. Yanagida. 2016. Transcriptional bursting is intrinsically caused by interplay between RNA polymerases on DNA. *Nat. Commun.* 7:13788.
36. Rajala, T., A. Häkkinen, ..., A. S. Ribeiro. 2010. Effects of transcriptional pausing on gene expression dynamics. *PLoS Comput. Biol.* 6:e1000704.
37. Mäkelä, J., J. Lloyd-Price, ..., A. S. Ribeiro. 2011. Stochastic sequence-level model of coupled transcription and translation in prokaryotes. *BMC Bioinformatics.* 12:121.
38. Ribeiro, A. S., A. Häkkinen, ..., O. Yli-Harja. 2010. Dynamical effects of transcriptional pause-prone sites. *Comput. Biol. Chem.* 34:143–148.
39. Kohler, R., R. A. Mooney, ..., P. Cramer. 2017. Architecture of a transcribing-translating expressome. *Science.* 356:194–197.
40. Proshkin, S., A. R. Rahmouni, ..., E. Nudler. 2010. Cooperation between translating ribosomes and RNA polymerase in transcription elongation. *Science.* 328:504–508.
41. Miller, O. L., Jr., B. A. Hamkalo, and C. A. Thomas, Jr. 1970. Visualization of bacterial genes in action. *Science.* 169:392–395.
42. Chen, H., K. Shiroguchi, ..., X. S. Xie. 2015. Genome-wide study of mRNA degradation and transcript elongation in *Escherichia coli*. *Mol. Syst. Biol.* 11:781.
43. Yarchuk, O., N. Jacques, ..., M. Dreyfus. 1992. Interdependence of translation, transcription and mRNA degradation in the *lacZ* gene. *J. Mol. Biol.* 226:581–596.
44. Deana, A., and J. G. Belasco. 2005. Lost in translation: the influence of ribosomes on bacterial mRNA decay. *Genes Dev.* 19:2526–2533.
45. Gillespie, D. T. 1977. Exact stochastic simulation of coupled chemical reactions. *J. Phys. Chem.* 81:2340–2361.
46. MacDonald, C. T., and J. H. Gibbs. 1969. Concerning the kinetics of polypeptide synthesis on polyribosomes. *Biopolymers.* 7:707–725.
47. MacDonald, C. T., J. H. Gibbs, and A. C. Pipkin. 1968. Kinetics of biopolymerization on nucleic acid templates. *Biopolymers.* 6:1–5.
48. Tripathi, T., and D. Chowdhury. 2008. Interacting RNA polymerase motors on a DNA track: effects of traffic congestion and intrinsic noise on RNA synthesis. *Phys. Rev. E.* 77:011921.
49. Adelman, K., A. La Porta, ..., M. D. Wang. 2002. Single molecule analysis of RNA polymerase elongation reveals uniform kinetic behavior. *Proc. Natl. Acad. Sci. USA.* 99:13538–13543.
50. Abbondanzieri, E. A., W. J. Greenleaf, ..., S. M. Block. 2005. Direct observation of base-pair stepping by RNA polymerase. *Nature.* 438:460–465.
51. Herbert, K. M., A. La Porta, ..., S. M. Block. 2006. Sequence-resolved detection of pausing by single RNA polymerase molecules. *Cell.* 125:1083–1094.
52. Gelles, J., and R. Landick. 1998. RNA polymerase as a molecular motor. *Cell.* 93:13–16.
53. Klumpp, S., and T. Hwa. 2008. Stochasticity and traffic jams in the transcription of ribosomal RNA: Intriguing role of termination and antitermination. *Proc. Natl. Acad. Sci. USA.* 105:18159–18164.
54. Epshtein, V., and E. Nudler. 2003. Cooperation between RNA polymerase molecules in transcription elongation. *Science.* 300:801–805.
55. Schadschneider, A., D. Chowdhury, and K. Nishinari. 2011. Stochastic transport in complex systems: from molecules to vehicles. Elsevier Science, Oxford, United Kingdom.
56. Steitz, J. A. 1969. Polypeptide chain initiation: nucleotide sequences of the three ribosomal binding sites in bacteriophage R17 RNA. *Nature.* 224:957–964.
57. Vogel, U., and K. F. Jensen. 1994. The RNA chain elongation rate in *Escherichia coli* depends on the growth rate. *J. Bacteriol.* 176:2807–2813.
58. Carrier, T. A., and J. D. Keasling. 1997. Mechanistic modeling of prokaryotic mRNA decay. *J. Theor. Biol.* 189:195–209.
59. Selinger, D. W., R. M. Saxena, ..., C. Rosenow. 2003. Global RNA half-life analysis in *Escherichia coli* reveals positional patterns of transcript degradation. *Genome Res.* 13:216–223.
60. Cannistraro, V. J., and D. Kennell. 1985. Evidence that the 5' end of *lac* mRNA starts to decay as soon as it is synthesized. *J. Bacteriol.* 161:820–822.
61. Nath, K., and A. L. Koch. 1970. Protein degradation in *Escherichia coli*. I. Measurement of rapidly and slowly decaying components. *J. Biol. Chem.* 245:2889–2900.
62. Cai, L., N. Friedman, and X. S. Xie. 2006. Stochastic protein expression in individual cells at the single molecule level. *Nature.* 440:358–362.
63. Li, G.-W., D. Burkhardt, ..., J. S. Weissman. 2014. Quantifying absolute protein synthesis rates reveals principles underlying allocation of cellular resources. *Cell.* 157:624–635.
64. Choi, P. J., L. Cai, ..., X. S. Xie. 2008. A stochastic single-molecule event triggers phenotype switching of a bacterial cell. *Science.* 322:442–446.
65. McClure, W. R. 1985. Mechanism and control of transcription initiation in prokaryotes. *Annu. Rev. Biochem.* 54:171–204.
66. Wade, J. T., and K. Struhl. 2008. The transition from transcriptional initiation to elongation. *Curr. Opin. Genet. Dev.* 18:130–136.
67. Yu, J., J. Xiao, ..., X. S. Xie. 2006. Probing gene expression in live cells, one protein molecule at a time. *Science.* 311:1600–1603.
68. Bernstein, J. A., A. B. Khodursky, ..., S. N. Cohen. 2002. Global analysis of mRNA decay and abundance in *Escherichia coli* at single-gene resolution using two-color fluorescent DNA microarrays. *Proc. Natl. Acad. Sci. USA.* 99:9697–9702.
69. Neuman, K. C., E. A. Abbondanzieri, ..., S. M. Block. 2003. Ubiquitous transcriptional pausing is independent of RNA polymerase backtracking. *Cell.* 115:437–447.
70. Shaevitz, J. W., E. A. Abbondanzieri, ..., S. M. Block. 2003. Backtracking by single RNA polymerase molecules observed at near-base-pair resolution. *Nature.* 426:684–687.
71. Shundrovsky, A., T. J. Santangelo, ..., M. D. Wang. 2004. A single-molecule technique to study sequence-dependent transcription pausing. *Biophys. J.* 87:3945–3953.
72. Hein, P. P., K. E. Kolb, ..., R. Landick. 2014. RNA polymerase pausing and nascent-RNA structure formation are linked through clamp-domain movement. *Nat. Struct. Mol. Biol.* 21:794–802.
73. Duchi, D., D. L. Bauer, ..., A. N. Kapanidis. 2016. RNA polymerase pausing during initial transcription. *Mol. Cell.* 63:939–950.
74. Davenport, R. J., G. J. Wuite, ..., C. Bustamante. 2000. Single-molecule study of transcriptional pausing and arrest by *E. coli* RNA polymerase. *Science.* 287:2497–2500.
75. Landick, R., J. Carey, and C. Yanofsky. 1985. Translation activates the paused transcription complex and restores transcription of the *trp* operon leader region. *Proc. Natl. Acad. Sci. USA.* 82:4663–4667.

76. Artsimovitch, I., and R. Landick. 2000. Pausing by bacterial RNA polymerase is mediated by mechanistically distinct classes of signals. *Proc. Natl. Acad. Sci. USA*. 97:7090–7095.
77. Lee, D. N., L. Phung, ..., R. Landick. 1990. Transcription pausing by *Escherichia coli* RNA polymerase is modulated by downstream DNA sequences. *J. Biol. Chem.* 265:15145–15153.
78. Forde, N. R., D. Izhaky, ..., C. Bustamante. 2002. Using mechanical force to probe the mechanism of pausing and arrest during continuous elongation by *Escherichia coli* RNA polymerase. *Proc. Natl. Acad. Sci. USA*. 99:11682–11687.
79. Hollands, K., A. Sevostiyanova, and E. A. Groisman. 2014. Unusually long-lived pause required for regulation of a Rho-dependent transcription terminator. *Proc. Natl. Acad. Sci. USA*. 111:E1999–E2007.
80. Wang, G., J. Hauver, ..., A. Pertsinidis. 2016. Single-molecule real-time 3D imaging of the transcription cycle by modulation interferometry. *Cell*. 167:1839–1852.
81. Larson, M. H., R. A. Mooney, ..., J. S. Weissman. 2014. A pause sequence enriched at translation start sites drives transcription dynamics in vivo. *Science*. 344:1042–1047.
82. Vvedenskaya, I. O., H. Vahedian-Movahed, ..., B. E. Nickels. 2014. Interactions between RNA polymerase and the “core recognition element” counteract pausing. *Science*. 344:1285–1289.
83. Reppas, N. B., J. T. Wade, ..., K. Struhl. 2006. The transition between transcriptional initiation and elongation in *E. coli* is highly variable and often rate limiting. *Mol. Cell*. 24:747–757.
84. Mooney, R. A., S. A. Darst, and R. Landick. 2005. Sigma and RNA polymerase: an on-again, off-again relationship? *Mol. Cell*. 20:335–345.
85. Deighan, P., C. Pukhrambam, ..., A. Hochschild. 2011. Initial transcribed region sequences influence the composition and functional properties of the bacterial elongation complex. *Genes Dev*. 25:77–88.
86. Mooney, R. A., S. E. Davis, ..., R. Landick. 2009. Regulator trafficking on bacterial transcription units in vivo. *Mol. Cell*. 33:97–108.
87. Wade, J. T., and K. Struhl. 2004. Association of RNA polymerase with transcribed regions in *Escherichia coli*. *Proc. Natl. Acad. Sci. USA*. 101:17777–17782.
88. Harden, T. T., C. D. Wells, ..., J. Gelles. 2016. Bacterial RNA polymerase can retain  $\sigma 70$  throughout transcription. *Proc. Natl. Acad. Sci. USA*. 113:602–607.
89. Raffaele, M., E. I. Kanin, ..., A. Z. Ansari. 2005. Holoenzyme switching and stochastic release of sigma factors from RNA polymerase in vivo. *Mol. Cell*. 20:357–366.
90. Kapanidis, A. N., E. Margeat, ..., S. Weiss. 2005. Retention of transcription initiation factor  $\sigma 70$  in transcription elongation: single-molecule analysis. *Mol. Cell*. 20:347–356.
91. Nickels, B. E., J. Mukhopadhyay, ..., A. Hochschild. 2004. The  $\sigma 70$  subunit of RNA polymerase mediates a promoter-proximal pause at the lac promoter. *Nat. Struct. Mol. Biol.* 11:544–550.
92. Brodolin, K., N. Zenkin, ..., H. Heumann. 2004. The  $\sigma 70$  subunit of RNA polymerase induces lacUV5 promoter-proximal pausing of transcription. *Nat. Struct. Mol. Biol.* 11:551–557.
93. Roberts, J. W., W. Yarnell, ..., C. W. Roberts. 1998. Antitermination by bacteriophage lambda Q protein. *Cold Spring Harb. Symp. Quant. Biol.* 63:319–325.
94. Ring, B. Z., W. S. Yarnell, and J. W. Roberts. 1996. Function of *E. coli* RNA polymerase  $\sigma$  factor  $\sigma 70$  in promoter-proximal pausing. *Cell*. 86:485–493.
95. Hatoum, A., and J. Roberts. 2008. Prevalence of RNA polymerase stalling at *Escherichia coli* promoters after open complex formation. *Mol. Microbiol.* 68:17–28.
96. Ehrensberger, A. H., G. P. Kelly, and J. Q. Svejstrup. 2013. Mechanistic interpretation of promoter-proximal peaks and RNAPII density maps. *Cell*. 154:713–715.
97. Kainz, M., and J. W. Roberts. 1995. Kinetics of RNA polymerase initiation and pausing at the lambda late gene promoter in vivo. *J. Mol. Biol.* 254:808–814.
98. Subramaniam, A. R., B. M. Zid, and E. K. O’Shea. 2014. An integrated approach reveals regulatory controls on bacterial translation elongation. *Cell*. 159:1200–1211.
99. Ferrin, M. A., and A. R. Subramaniam. 2017. Kinetic modeling predicts a stimulatory role for ribosome collisions at elongation stall sites in bacteria. *eLife*. 6:e23629.
100. Griffith, K. L., and R. E. Wolf, Jr. 2002. Measuring  $\beta$ -galactosidase activity in bacteria: cell growth, permeabilization, and enzyme assays in 96-well arrays. *Biochem. Biophys. Res. Commun.* 290:397–402.
101. Joo, C., and T. Ha. 2012. Labeling DNA (or RNA) for single-molecule FRET. *Cold Spring Harb. Protoc.* 2012:1005–1008.
102. Sliusarenko, O., J. Heinritz, ..., C. Jacobs-Wagner. 2011. High-throughput, subpixel precision analysis of bacterial morphogenesis and intracellular spatio-temporal dynamics. *Mol. Microbiol.* 80:612–627.
103. Kepes, A. 1969. Transcription and translation in the lactose operon of *Escherichia coli* studied by in vivo kinetics. *Prog. Biophys. Mol. Biol.* 19:199–236.



**Biophysical Journal, Volume 114**

**Supplemental Information**

**Effects of mRNA Degradation and Site-Specific Transcriptional Pausing on Protein Expression Noise**

**Sangjin Kim and Christine Jacobs-Wagner**

## Supporting Material

### Effects of mRNA degradation and site-specific transcriptional pausing on protein expression noise

Sangjin Kim and Christine Jacobs-Wagner

#### Contents

|                                                                                                 |    |
|-------------------------------------------------------------------------------------------------|----|
| Supporting Text.....                                                                            | 2  |
| Guidelines for using our simulation code .....                                                  | 2  |
| Supporting Materials and Methods.....                                                           | 6  |
| Miller's $\beta$ -galactosidase assay (related to Fig. S1A) .....                               | 6  |
| Fluorescence <i>in situ</i> hybridization (FISH) microscopy (related to Fig. S1B) .....         | 6  |
| Supporting Table.....                                                                           | 8  |
| Table S1. Oligonucleotide probes used for the <i>lacZ</i> mRNA FISH microscopy experiment ..... | 8  |
| Supporting Figures.....                                                                         | 9  |
| Supporting References .....                                                                     | 27 |

## Supporting Text

### Guidelines for using our simulation code

Our MATLAB-based code can be used to reproduce the data presented in this paper and to produce new data using different input variables. Below, we explain (i) the input variables that need to be changed to model the expression of genes of interest (*lacZ* and others) and (ii) the types of simulation results (output) that can be obtained.

Universal parameters (no need to change):

| Parameter name as in the code | Value (unit) | Description                                                                               |
|-------------------------------|--------------|-------------------------------------------------------------------------------------------|
| <code>dx</code>               | 1 (nt)       | Size of the lattice for TASEP. RNAP and ribosome make an one-directional step every 1 nt. |
| <code>polWidth</code>         | 35 (bp)      | Footprint size of RNAPs                                                                   |
| <code>riboWidth</code>        | 30 (nt)      | Footprint size of ribosomes                                                               |

Gene-specific parameters (we used values relevant for the *E. coli lacZ* gene):

| Parameter name as in the code                                    | Value (unit)                                                                        | Description                                                                                                                                                                                                                           |
|------------------------------------------------------------------|-------------------------------------------------------------------------------------|---------------------------------------------------------------------------------------------------------------------------------------------------------------------------------------------------------------------------------------|
| <code>geneLength</code>                                          | 3075 (bp)                                                                           | Length of the gene of interest. The first base is assumed as the promoter, transcription start site, as well as the ribosome-binding site.                                                                                            |
| <code>mRNALL</code>                                              | 90 (sec)                                                                            | Mean mRNA lifetime                                                                                                                                                                                                                    |
| <code>proteinLL</code>                                           | 1200 (sec)                                                                          | Mean protein lifetime. See <code>simTime</code> .                                                                                                                                                                                     |
| <code>kRiboLoading</code>                                        | 0.2 (sec <sup>-1</sup> )                                                            | Translation initiation rate                                                                                                                                                                                                           |
| <code>kOn/</code><br><code>kOff/</code><br><code>kLoading</code> | 0.007/<br>varied/<br>0.45 (sec <sup>-1</sup> )                                      | Transcription initiation rate for bursty promoters. The inverse of <code>kOn</code> and <code>kOff</code> are average duration of OFF and ON periods, respectively. <code>kLoading</code> is the RNAP loading rate during ON periods. |
| <code>kLoading</code>                                            | Varied (sec <sup>-1</sup> )                                                         | Transcription initiation rate for nonbursty promoters.                                                                                                                                                                                |
| <code>avgSpeed</code>                                            | 30 (nt/sec)                                                                         | Mean RNAP or ribosome speed                                                                                                                                                                                                           |
| <code>pauseProfile</code>                                        | 'flat' or<br>'OnepauseAbs' or<br>'MultipauseAbs'<br>(capital letters are important) | Profile of pauses along the gene. 'flat' is for no pause. 'OnepauseAbs' is for one pause site. 'MultipauseAbs' is for two pause sites along the gene.                                                                                 |
| <code>pauseSite</code>                                           | 1500 (nt)                                                                           | A pause site at a single position.                                                                                                                                                                                                    |

|                   |                       |                                                                                                                                                                                                                                                                                                                   |
|-------------------|-----------------------|-------------------------------------------------------------------------------------------------------------------------------------------------------------------------------------------------------------------------------------------------------------------------------------------------------------------|
|                   | 1500 and 2500         | Two pause sites at two distinct locations                                                                                                                                                                                                                                                                         |
| pauseDuration     | 10 (sec)<br>10 and 15 | Pause duration at a single site.<br>Pause durations specified for two pause sites (corresponding to the location specified in pauseSite).                                                                                                                                                                         |
| pauseProb         | 80 (%)                | Probability of pausing at the pause site specified in pauseSite.                                                                                                                                                                                                                                                  |
| specificDwelltime |                       | Dwell time of an RNAP at each nucleotide position along the template. Generally, it is calculated based on input (avgSpeed, pauseProfile, pauseSite, pauseDuration). However, one can specify dwell time at every nucleotide position by modifying specificDwelltime array in the code.                           |
| simTime           | 0:1:40*60 (sec)       | Simulation time is from 0 to 40 min (2400 sec). The simulation time is set to achieve steady state in mRNA distribution. Longer simulation time would be needed for long mRNA lifetimes. To achieve steady state in protein levels with protein lifetime of 20 min, we set the simulation time from 0 to 200 min. |

Technical parameters that users may want to change:

| Parameter name as in the code | Value (unit) | Description                                                                                                                                                                                                                                                                                                                                                 |
|-------------------------------|--------------|-------------------------------------------------------------------------------------------------------------------------------------------------------------------------------------------------------------------------------------------------------------------------------------------------------------------------------------------------------------|
| N_totalLoci                   | 100          | Total copy number of DNA templates to be simulated. This equals the number of iterations. To get distributions of mRNA and proteins per DNA template, we performed many iterations. Default value for N_totalLoci is 100 and we repeat 10 times, for a total of 1000 iterations (this helps more efficient PC core usage than setting N_totalLoci as 1000). |

`code_for_gene_expression_dist_no_elongation:`

This is the folder to check if one wants to test an elongation-free model (i.e., that does not include transcription or translation elongation). Based on the transcription initiation, translation initiation, and mRNA lifetime input values, one can obtain distributions of mRNA and protein numbers per DNA template. mRNA and proteins are counted without any length information, so the results can be directly compared with analytical models that do not consider elongation



processes (e.g. (1-4)). The mRNA distributions are calculated at multiple time points, so that users can see the temporal progression of mRNA levels (e.g., as in the case of transcription induction experiments). The same is true for protein levels, when protein degradation was considered. Additionally, the code calculates the average RNAP loading rate, the RNAP headway distribution (at the time of initiation), and the mRNA lifetime distribution. See `mastertranscript.m` for example command lines to use. The output parameters of the analysis are described below:

- `tsxInitiationrate`: Effective RNAP loading rate ( $\text{sec}^{-1}$ ) and RNAP loading interval (sec) by calculating the number of RNAPs loaded during the sample time (default: 15-30 min) after the start of simulation.
- `RNAPheadway`: Distribution of RNAP headway at the start of transcription.
- `mRNAdist`: Distribution of mRNA copy numbers per DNA template at steady state (or at a specific time of interest).
- `mRNAstat`: mean, Fano factor, CV and  $\text{CV}^2$  of `mRNAdist`.
- `proteindist`: Distribution of the number of proteins accumulated during 10 min between 20-30 min of the simulation time.
- `proteinstat`: mean, Fano factor, CV and  $\text{CV}^2$  of `proteindist`.
- `steadystateprotein`: mean, Fano factor, CV and  $\text{CV}^2$  of protein abundance considering protein degradation.

`code_for_gene_expression_distribution`:

This is the folder to check if one wants to test our integrated model, as described in Fig. 1B. The outputs are in the form of distributions or average values, calculated from many iterations. The output parameters of “par” functions are described below:

- `loadingSample`: The number of RNAPs successfully loaded during the sample time (default: 15-30 min after the start of simulation) on each DNA template.
- `presentonDNA`: The number of elongating RNAPs on each DNA template at a given time (default: 20 min after the start of simulation).
- `fishSignal1`, `fishSignal2`, `fishSignal3`: The number of mRNAs produced (and not yet decayed) from each DNA template at a given time (default: `fishTime` = every 1 min in the first 30 min of the simulation). mRNAs are counted either by 5'-end mRNA nucleotide (`fishSignal1`), or 3'-end mRNA nucleotide (`fishSignal2`), or using tiling probes (`fishSignal3`), as mentioned in Fig. S2B.
- `riboNumHistFine`: Distribution of the number of ribosomes successfully loaded per mRNA during its lifetime. This indicates translation efficiency. It is calculated from transcripts whose RNAPs initiated during the sample time (default: 15-30 min after the start of simulation).

- `rEndStampA`: The number of ribosomes that finish translation elongation from each DNA template during a certain time period (default: every 10 sec during 10-40 min after the start of simulation).
- `proteinLocs2`: The number of proteins produced during a certain time period (default: 20-30 min after the start of simulation).
- `proteinSS`: The number of proteins produced (and not yet degraded) from each DNA template at a given time (default: measured every 1 min during `fishTime`).
- `lifeTimeHist1`, `lifeTimeHist2`, `lifeTimeAvg`: Distributions of the lifetime of mRNA at the 5' and 3' ends are `lifeTimeHist1` and `lifeTimeHist2`, respectively. Average lifetimes of 5'- and 3'-end mRNA are `lifeTimeAvg`. Lifetimes were calculated from transcripts whose RNAPs were loaded during the sample time (default: 15-30 min after the start of simulation).
- `tDiffStartHist`, `tDiffEndHist`, `tDiffDHist`: Distributions of RNAP headway at the first base of the template and at the end of the template are `tDiffStartHist` and `tDiffEndHist`, respectively. `tDiffDHist` is the distribution of headway changes ( $\Delta$ headway) during transcription elongation.

In order to run the code, one should start with `masterscript.m`.

Note: Since the simulation is based on the MATLAB function *parfor*, it is important to specify the number of workers (CPU core) inside the code. The default is set as 12 workers. If the available CPU number is different from 12, one needs to change the *parpool* line in the code accordingly.

`code_for_RNAP_traffic`:

This is the folder to check if one wants to examine only the RNAP traffic (without mRNA degradation and translation). Code in this folder calculates transcription initiation and elongation under various initiation and elongation conditions. The output is RNAP trajectories or time points when an RNAP exits each nucleotide position (`exitTime`). Codes do not use the *parfor* function, as in the previous case, and therefore, the variables are more trackable.

## Supporting Materials and Methods

### Miller's $\beta$ -galactosidase assay (related to Fig. S1A)

A wild-type *E. coli* strain (MG1655) was grown in liquid cultures of M9 minimal medium supplemented with 0.2% glycerol, 0.1% casamino acids and 1 mg/L thiamine at 30°C. Expression of *lacZ* was induced with isopropyl  $\beta$ -D-1-thiogalactopyranoside (IPTG) when the cultures reached early exponential growth phase ( $OD_{600} \sim 0.2$  from  $>10^3$  dilution from overnight culture). IPTG (0.5 mM) was added at  $t = 0$  and 300  $\mu$ L of culture was taken every 20-60 sec and pipetted into a 1.5-mL tube containing cold chloramphenicol (5 mg/mL; to be diluted 10 fold by the cell culture). The tubes were kept in an ice bucket throughout the remaining procedure, following a standard Miller assay protocol (5). In short, 190  $\mu$ L cell cultures from each tube were transferred to a 96-well plate to measure the optical density of the culture at 600 nm ( $OD_{600}$ ). Next, the remaining cells in the tubes were lysed by adding 50  $\mu$ L of lysis buffer (60 mM disodium phosphate, 40 mM monosodium phosphate, 10 mM potassium chloride, 1 mM magnesium sulfate, 0.0075% sodium dodecyl sulfate, plus 188 mM  $\beta$ -mercaptoethanol) and 20  $\mu$ L of chloroform. After lysis, 150  $\mu$ L of the supernatant was transferred to a new 96-well plate, containing 40  $\mu$ L of ortho-nitrophenyl- $\beta$ -galactoside (ONPG) solution (4 mg/mL in the lysis buffer). Hydrolysis of ONPG by LacZ in the cell lysate produces *o*-nitrophenol, which is yellow. The color change was monitored by measuring absorbance at 420 nm with a microplate reader (Synergy 2, Biotek). Plus, absorbance at 550 nm was measured to account for cell debris. LacZ activity was calculated as:

$$LacZ \text{ activity} = 1000 \times \frac{OD_{420} - 1.75 \times OD_{550}}{t \times OD_{600}} \times \text{dilution factor},$$

where  $t$  is the ONPG reaction time in minutes and OD indicates optical density measurements. The dilution factor is the fraction of cell lysates in the final volume of the ONPG reaction.

### Fluorescence *in situ* hybridization (FISH) microscopy (related to Fig. S1B)

To determine the lifetime of *lacZ* mRNAs, we grew wild-type *E. coli* strain (MG1655) in M9 minimal medium supplemented with 0.2% glycerol, 0.1% casamino acids and 1 mg/L thiamine at 30°C. A culture grown to early exponential growth phase ( $OD_{600} \sim 0.2$  from  $>10^3$  dilution from overnight culture) was split into two separate cultures. One, the “repressed” sample, was used

directly to examine *lacZ* mRNA expression under the repressed condition. The other, the “induced” sample, was first used to induce *lacZ* expression by IPTG (0.2 mM). In this induced sample, glucose (500 mM) was added at  $t = 3.5$  min to turn off the promoter and to observe degradation of the *lacZ* mRNA. Aliquots (750  $\mu$ L) were taken from the induced culture every 1 min after restoring repression, and were immediately put into a 1.5-mL tube containing a 4x fixing solution made of 16% formaldehyde in sodium phosphate buffer at pH 7.4. Cells were fixed for 15 min at room temperature and 30 min on ice. For the repressed sample, an aliquot was taken only once and cells were fixed in the same manner. Next, the fixed cells were washed with diethyl pyrocarbonate (DEPC)-treated phosphate buffered saline (PBS) buffer 3 times and were applied onto coverslips coated with poly-L-lysine. All the remaining procedures were performed while cells adhered on the coverslip.

Cells were lysed with 70% ethanol for 5 min. Next, prehybridization was performed in a solution containing 20% formamide, 2x saline-sodium citrate buffer (2x SSC; 300 mM sodium chloride, 30 mM sodium citrate, pH 7.0), and 0.2 mM vanadyl ribonucleoside complex (VRC) for 30 min at 37°C. Hybridization was performed with 24 20-nt-long oligonucleotides that have sequences complementary to the first 1000-nt region of the *lacZ* mRNA (see Table S1 for sequence data). The probes were labeled with Cy5 at the 5' end (6) and purified by ultra performance liquid chromatography (Acquity UPLC system, Waters) on an Acquity BEH C18 column. The eluents were A: 100 mM triethylammonium acetate in Milli-Q water and B: 100% acetonitrile. The gradient was set as follows: 0-5 min with 0% B, 5-35 min with a 0-30% linear gradient of B, 35-37 min with a 30-100% linear gradient of B, and 37-40 min with 0% B. The flow rate was kept at 0.1 mL/min. Chromatograms were recorded at 260 and 650 nm.

The hybridization solution consists of 4 nM of probes in 20% formamide, 2x SSC, 0.2 mM VRC, 10% dextran sulfate, 0.1% bovine serum albumin, and 0.4 mg/mL *E. coli* tRNA. The solution was applied to cells for 2 h at 37°C. After washing with wash solutions (25% formamide and 2x SSC) and DEPC-PBS, DEPC-PBS was applied on the sample, and the coverslip was mounted on a glass slide. Imaging by phase contrast and fluorescence microscopy was performed on an Eclipse 80i microscope (Nikon) equipped with a phase-contrast objective Plan Apochromat 100 $\times$ /1.40 NA (Nikon) and an Orca-II-ER CCD camera (Hamamatsu Photonics).

To determine the average fluorescent intensity of a single *lacZ* mRNA, we measured the fluorescence spot intensity of *lacZ* mRNA signal under the repressed condition (7, 8) using the



spotFinder tool in MicrobeTracker (9). The number of mRNAs per cell was obtained by dividing the total fluorescence signal per cell by the single-mRNA signal.

## Supporting Table

**Table S1. Oligonucleotide probes used for the *lacZ* mRNA FISH microscopy experiment**

| Oligonucleotide name | Sequence (from 5')    |
|----------------------|-----------------------|
| lacZ1                | GTGAATCCGTAATCATGGTC  |
| lacZ2                | TCACGACGTTGTAACGAC    |
| lacZ3                | ATTAAGTTGGGTAACGCCAG  |
| lacZ4                | TATTACGCCAGCTGGCGAAA  |
| lacZ5                | ATTCAGGCTGCGCAACTGTT  |
| lacZ6                | AAACCAGGCAAAGCGCCATT  |
| lacZ7                | AGTATCGGCCTCAGGAAGAT  |
| lacZ8                | AACCGTGCATCTGCCAGTTT  |
| lacZ9                | TAGGTCACGTTGGTGTAGAT  |
| lacZ10               | AATGTGAGCGAGTAACAACC  |
| lacZ11               | GTAGCCAGCTTTCATCAACA  |
| lacZ12               | AATAATTCGCGTCTGGCCTT  |
| lacZ13               | AGATGAAACGCCGAGTTAAC  |
| lacZ14               | AATTCAGACGGCAAACGACT  |
| lacZ15               | TTTCTCCGGCGCGTAAAAAT  |
| lacZ16               | ATCTTCCAGATAACTGCCGT  |
| lacZ17               | AACGAGACGTCACGGAAAAT  |
| lacZ18               | GCTGATTTGTGTAGTCGGTT  |
| lacZ19               | TTAAAGCGAGTGGCAACATG  |
| lacZ20               | AACTGTTACCCGTAGGTAGT  |
| lacZ21               | ATAATTTACCCGCCGAAAGG  |
| lacZ22               | TTTCGACGTTTCAGACGTAGT |
| lacZ23               | ATAGAGATTCGGGATTTCCG  |
| lacZ24               | TTCTGCTTCAATCAGCGTGC  |

The probes were labeled with Cy5 at the 5' end and were used for the FISH microscopy experiment shown in Fig. S1B.

## Supporting Figures

A

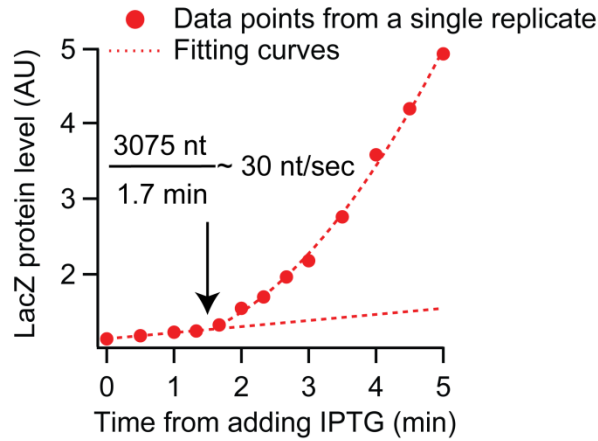

B

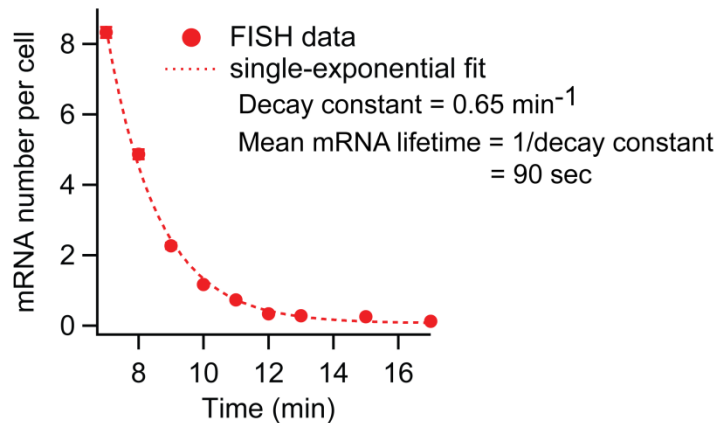

**FIGURE S1. Experimental determination of RNAP translocation speed and *lacZ* mRNA lifetime.** (A) *In vivo* determination of RNAP speed on the *lacZ* DNA template. The overall speed of RNAP during transcription elongation was calculated from the time lag of the first LacZ protein appearance after addition of the inducer IPTG to wild-type *E. coli* MG1655 cell culture (10). Red dotted lines are a line fit for baseline and a quadratic fit for the increase of LacZ level over time, respectively (11). From the two fits, we found that it took  $\sim 1.7$  min for the synthesis of 3075-nt *lacZ* mRNA. By performing this procedure in multiple replicates ( $n > 3$ ), we obtained  $\sim 30$  nt/sec of average RNAP speed. (B) Determination of *lacZ* mRNA lifetime *in vivo*. Mean lifetime of *lacZ* mRNA was measured from wild-type *E. coli* cells growing under the same condition as in (A). We fit an exponential function to the decaying mRNA signal to obtain the mean mRNA lifetime. Error bars are the standard error of mean, estimated from bootstrapping.

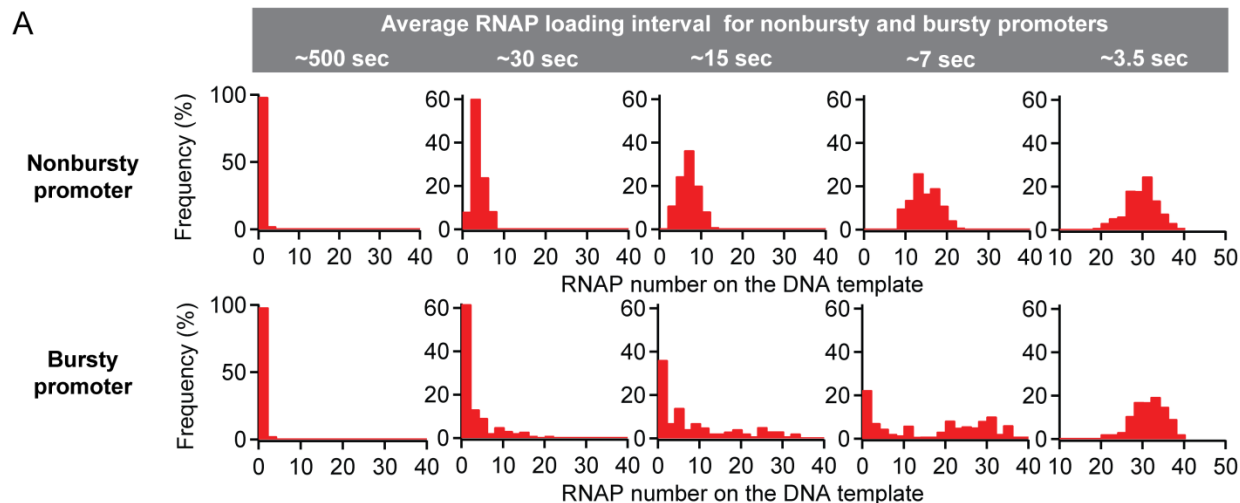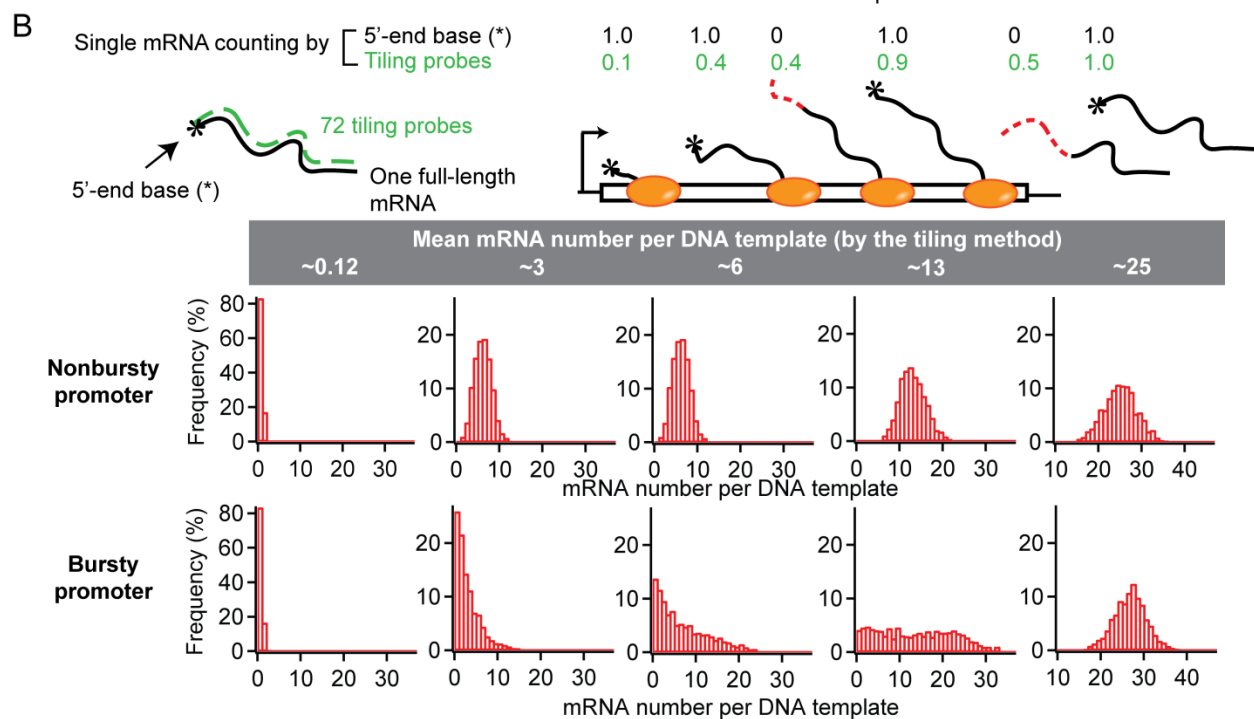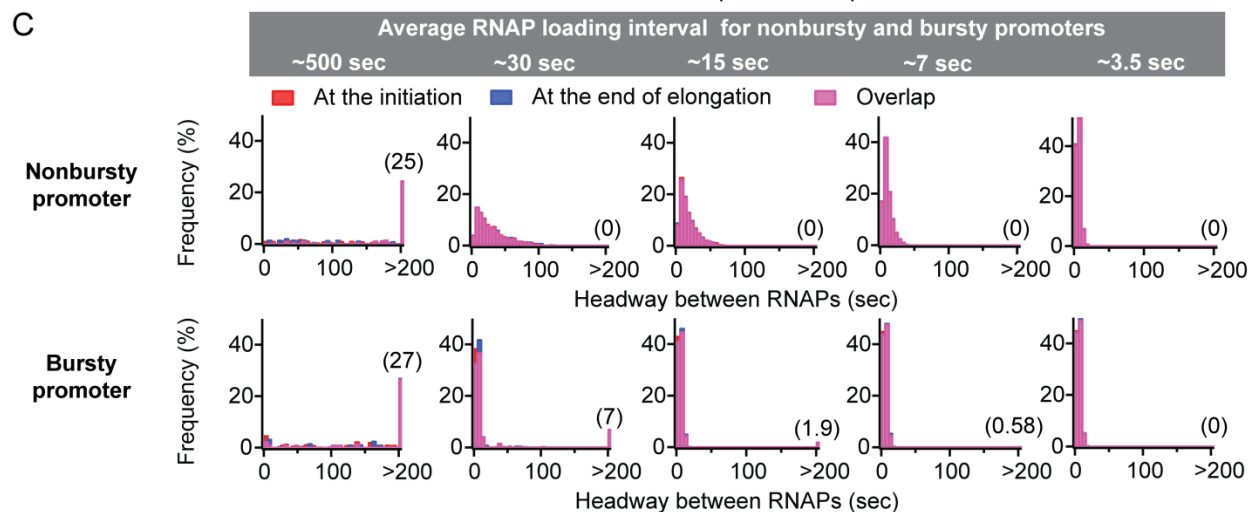

**FIGURE S2. Effect of nonbursty and bursty promoters on RNAP traffic and mRNA number distributions.** (A) Number of RNAPs on the DNA template under various conditions of transcription initiation used in Fig. 2. We plotted the number of RNAPs on a DNA template at a given moment (at  $t = 1200$  sec of the simulation time) from 1000 simulations. The distinction between nonbursty and bursty transcription initiations was apparent in the intermediate range of initiation intervals, as shown in Fig. 2B. (B) Distributions of mRNA numbers determined by a method that better reflects the counting method used in experiments. (Top) Schematics of different mRNA counting methods. In general, we counted mRNAs by considering their first base (5' end, marked as \*), as in Fig. 2C. However, in experiments, the number of mRNA molecules per cell is generally obtained by mRNA fluorescence *in situ* hybridization (FISH) microscopy using multiple probes that tile the mRNA (e.g., 72 independent probes of 20 nt for *lacZ* mRNA (7, 8)). Since our modeling results contain information about which nucleotides are present in each mRNA at a given time, we were able to examine the effect of using multiple tiling probes on the mRNA number distributions. In this case, mRNA was counted as one mRNA when all the nucleotides complementary to the 72 probes, equally spaced throughout 3000 nt, were present on the mRNA. Using the first-base counting method, mRNAs are counted as one whenever the 5'-end base (\*) is present. Using the tiling method, nascent or partially degraded mRNAs are counted as a fraction based on their length. Red dotted lines indicate degraded mRNA bases. (Bottom) Steady-state distributions of mRNA numbers per DNA template (from  $n = 1000$  simulations) when mRNAs were counted using 72 virtual tiling probes to mimic FISH experiments (7, 8). Each distribution is from the corresponding simulation in Fig. 2C. (C) Distributions of headways between two subsequently loaded RNAPs at initiation and completion of transcription under various transcription initiation conditions used in Fig. 2B. The probability of seeing RNAP pairs with large ( $>200$ ) headways is indicated in parentheses. The results were obtained from simulations described in Fig. 2.

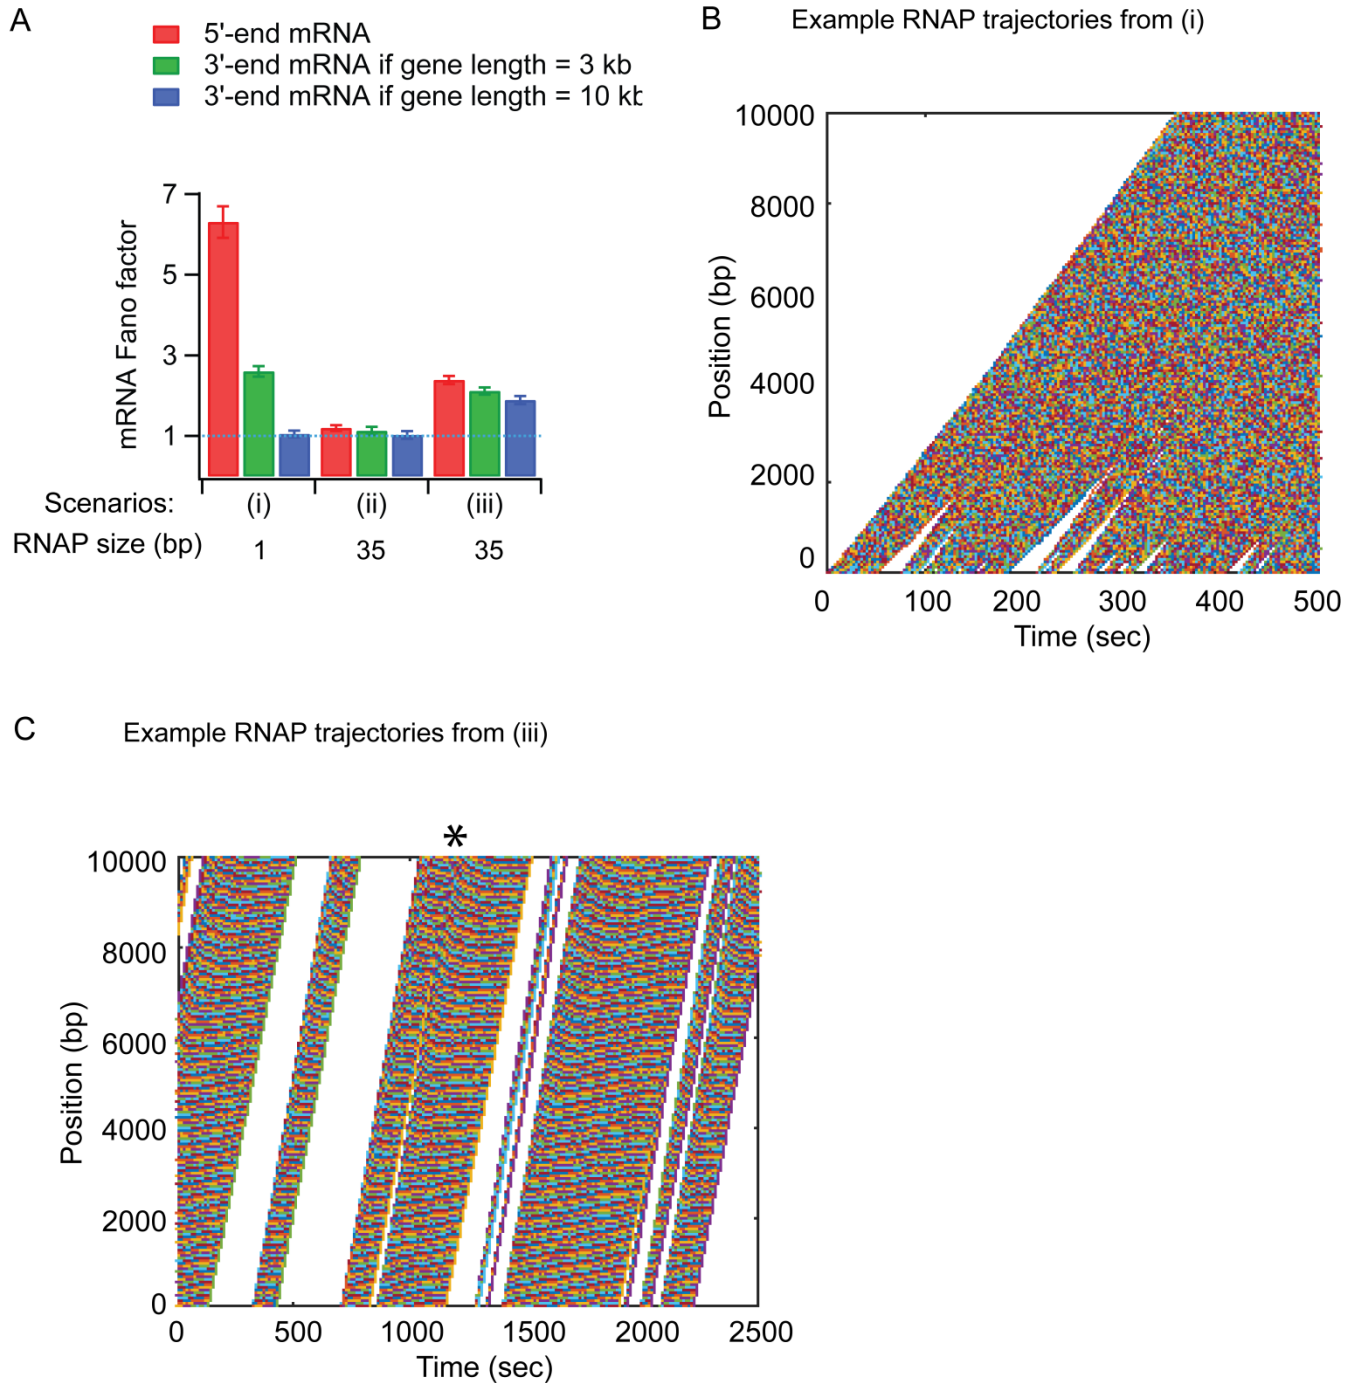

**FIGURE S3. RNAP bursts from a bursty promoter can disappear during transcription elongation under special conditions (related to Fig. 2D).** As in Dobrzyński and Bruggeman (2009), RNAPs were continually loaded back-to-back during ON periods. This was achieved by setting  $k_{\text{loading}} = 10 \times k_{\text{elongation}}$ . This condition ensures that successive RNAP loading occurs as soon as the promoter is cleared. (A) mRNA Fano factors at 5'

and 3' ends under various scenarios. The blue dotted line denotes an mRNA Fano factor of 1. (i) Case of RNAP size of 1 bp, as in Dobrzyński and Bruggeman (2009).  $\tau_{\text{ON}} = 5$  sec,  $f_{\text{ON}} = 0.5$ ,  $k_{\text{elongation}} = 30$  nt/sec. Under this condition, we expect  $\sim 150$  RNAP loading events per ON period. mRNA Fano factors calculated from the 5'-end and the 3'-end indicate that the burstiness from the promoter is completely lost at the end of 10-kb transcription (red vs. blue bar). (ii) Case of an RNAP size of 35 bp.  $\tau_{\text{ON}} = 5$  sec,  $f_{\text{ON}} = 0.5$ ,  $k_{\text{elongation}} = 30$  nt/sec (same as (i) except RNAP size). Under this condition, we expect  $\sim 4$  RNAP loading events per ON period. Under this condition, the 5'-end mRNA Fano factor is close to 1, indicating that the promoter is not bursty. There were not enough loading events during well-separated ON periods. (iii) Case of an RNAP size of 35 bp.  $\tau_{\text{ON}} = 150$  sec,  $f_{\text{ON}} = 0.5$ ,  $k_{\text{elongation}} = 30$  nt/sec.  $\tau_{\text{ON}}$  was increased to match the number of RNAPs loaded during ON periods as in (i). Under this condition, we expected  $\sim 130$  RNAP loading events per ON period. Although the promoter became slightly burstier than (ii), as shown by the increased 5'-end mRNA Fano factor, the burstiness set by the promoter was not completely lost at the end of a 10-kb gene (i.e., the 3'-end mRNA Fano factor is still greater than 1). (B) RNAP trajectories from an example simulation under the scenario (i). (C) RNAP trajectories from an example simulation under the scenario (iii). While we saw the expansion of RNAP bursts set by the promoter and the disappearance of certain OFF periods (indicated with \*), the burstiness from the promoter is mostly conserved during transcription elongation, indicated by the presence of OFF periods at both the beginning and end of transcription.

The results shown in (A-C) indicate that a 1-bp, and not 35-bp, RNAP size results in a complete loss of RNAP bursts from the promoter. This is because the small 1-bp RNAP footprint allows many RNAPs to load as a convoy for a given  $\tau_{\text{ON}}$  (i.e., RNAPs rapidly clear the RNAP binding site for the next initiation event), resulting in a large separation between subsequent RNAPs during transcription elongation. We tried testing similar numbers of RNAPs loaded back-to-back during ON periods by increasing  $\tau_{\text{ON}}$  for a larger RNAP size (scenario (i) vs (iii)). However, longer  $\tau_{\text{ON}}$  had to be accompanied by longer  $\tau_{\text{OFF}}$  to keep the promoter relatively bursty, and longer  $\tau_{\text{OFF}}$  prevented a loss of RNAP bursts by the end of transcription elongation through RNAP-RNAP separation. Overall, we were unable to find conditions for which we observed a complete loss of RNAP bursts from a bursty promoter when the RNAP footprint was 35 bp.

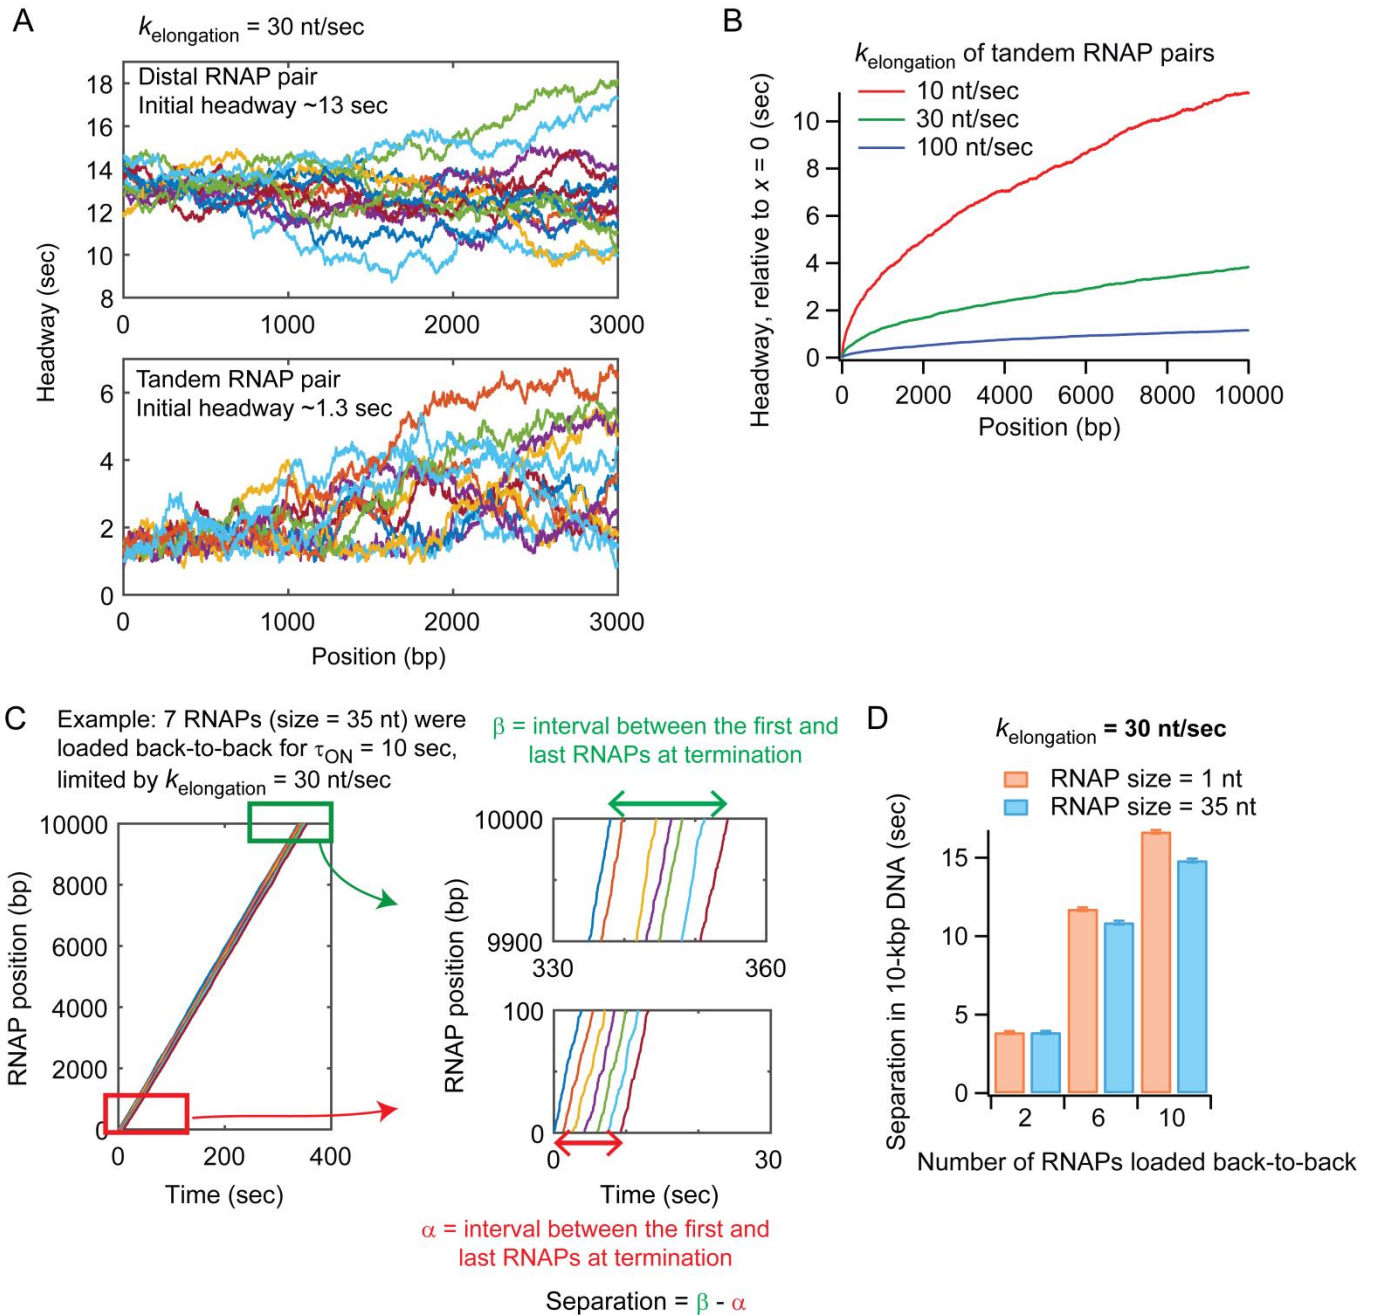

**FIGURE S4. Increase in the headway between adjacent RNAPs upon back-to-back RNAP loading.**

(A) Example headway trajectories showing how the headway between two adjacent RNAPs changed during transcription elongation as a function of the trailing RNAP position. Average RNAP speed was 30 nt/sec. (Top) In the case of distal RNAP pairs (two RNAPs loaded  $\sim 13 \text{ sec}$  apart), the headway could either increase or decrease during transcription elongation. (Bottom) In the case of tandem RNAP pairs (two RNAPs loaded back-to-back at an



interval of  $\sim 1.3$  sec), the headway between them could only increase during transcription elongation due to the steric hindrance between RNAPs. (B) Effect of RNAP speed on the average change in headway between two tandem RNAPs as a function of the trailing RNAP position. A larger headway change was observed under slower RNAP speed. In addition, the headway keeps increasing during transcription elongation, suggesting a larger headway change for longer genes. (C) Example RNAP trajectories showing RNAPs separating from each other during elongation. We considered 7 RNAPs loaded back-to-back and travelling at an average speed of 30 nt/sec along a 10-kbp DNA template. The time intervals between the first and last RNAPs in a convoy at transcription initiation ( $\alpha$ , red arrow) and termination ( $\beta$ , green) are illustrated in the zoomed trajectories. We defined “separation” as the difference between the red and green arrows. (D) Separation in an RNAP convoy as a function of the number of RNAPs in the convoy (convoy size). Average RNAP speed and gene length were 30 nt/sec and 10 kbp, respectively. Larger separations were observed with greater numbers of RNAPs per convoy. Changing the RNAP size (1 nt vs. 35 nt) had little effect.

The results in (A-D) indicate that the time separation between adjacent RNAPs can be maximized with (i) back-to-back RNAP loading, (ii) slower elongation speed, (iii) longer gene, and (iv) a large number of RNAPs loaded as a convoy.

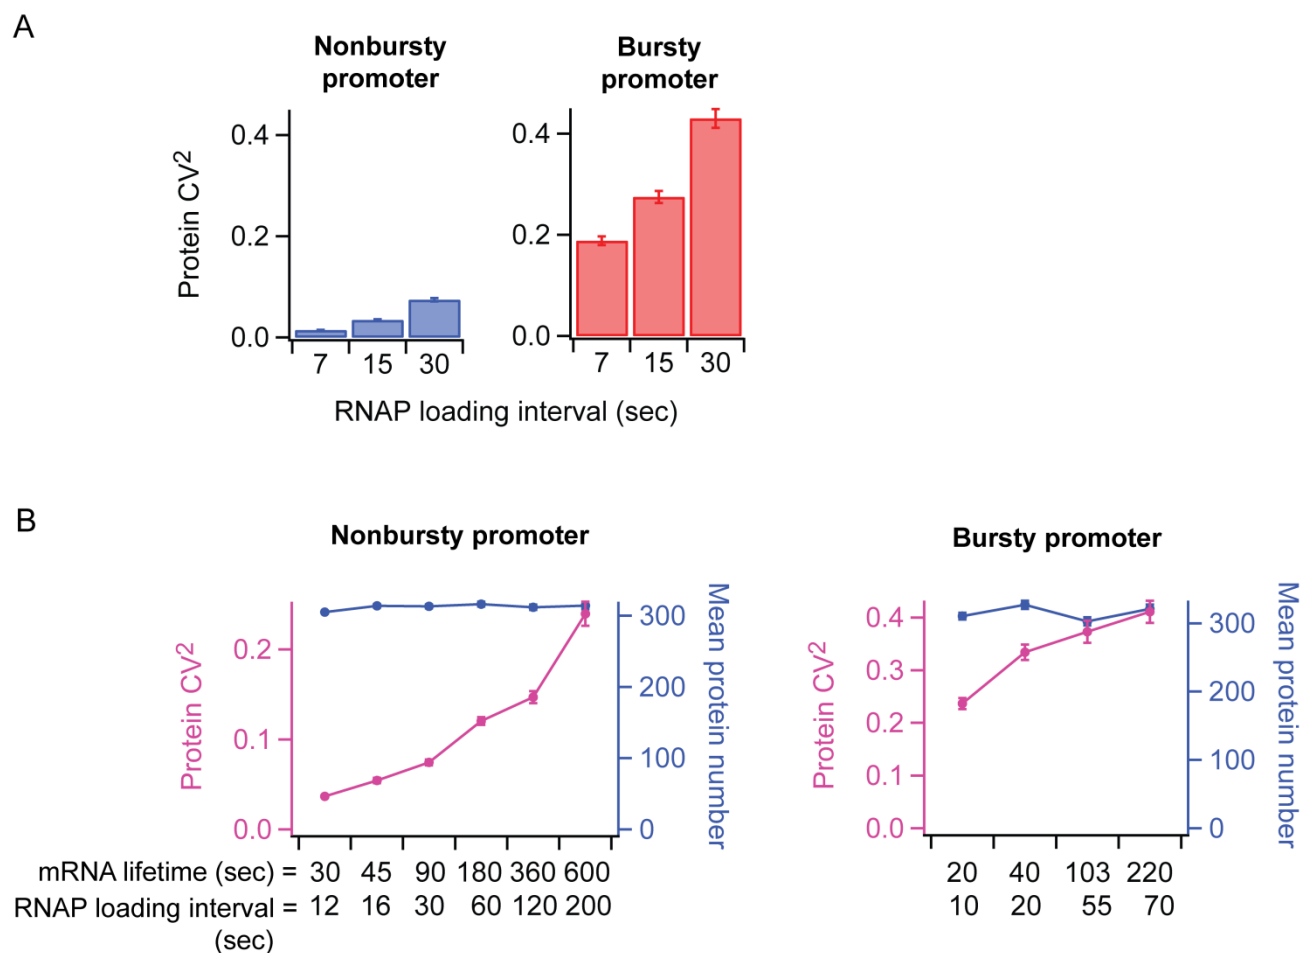

**FIGURE S5. Effect of the RNAP loading interval and the mRNA lifetime on protein expression noise.** (A) Effect of the RNAP loading interval on protein expression noise ( $CV^2$ ) when the mRNA lifetime was 90 sec. (B) Effect of simultaneous change in mRNA lifetime and RNAP loading interval on protein expression noise. We tested various conditions of mRNA lifetime and RNAP loading interval that maintain the same protein production (i.e., an increase in mRNA lifetime was compensated by an increase in RNAP loading interval to keep the same mean in protein levels). For the nonbursty-promoter case, we tested input RNAP loading intervals of 10, 15, 30, 60, 120, and 200 sec. For the bursty-promoter case, we tested input  $f_{ON}$  of 0.05, 0.1, 0.25, and 0.45. The RNAP loading intervals indicated in the plots was calculated from the output of the simulations.

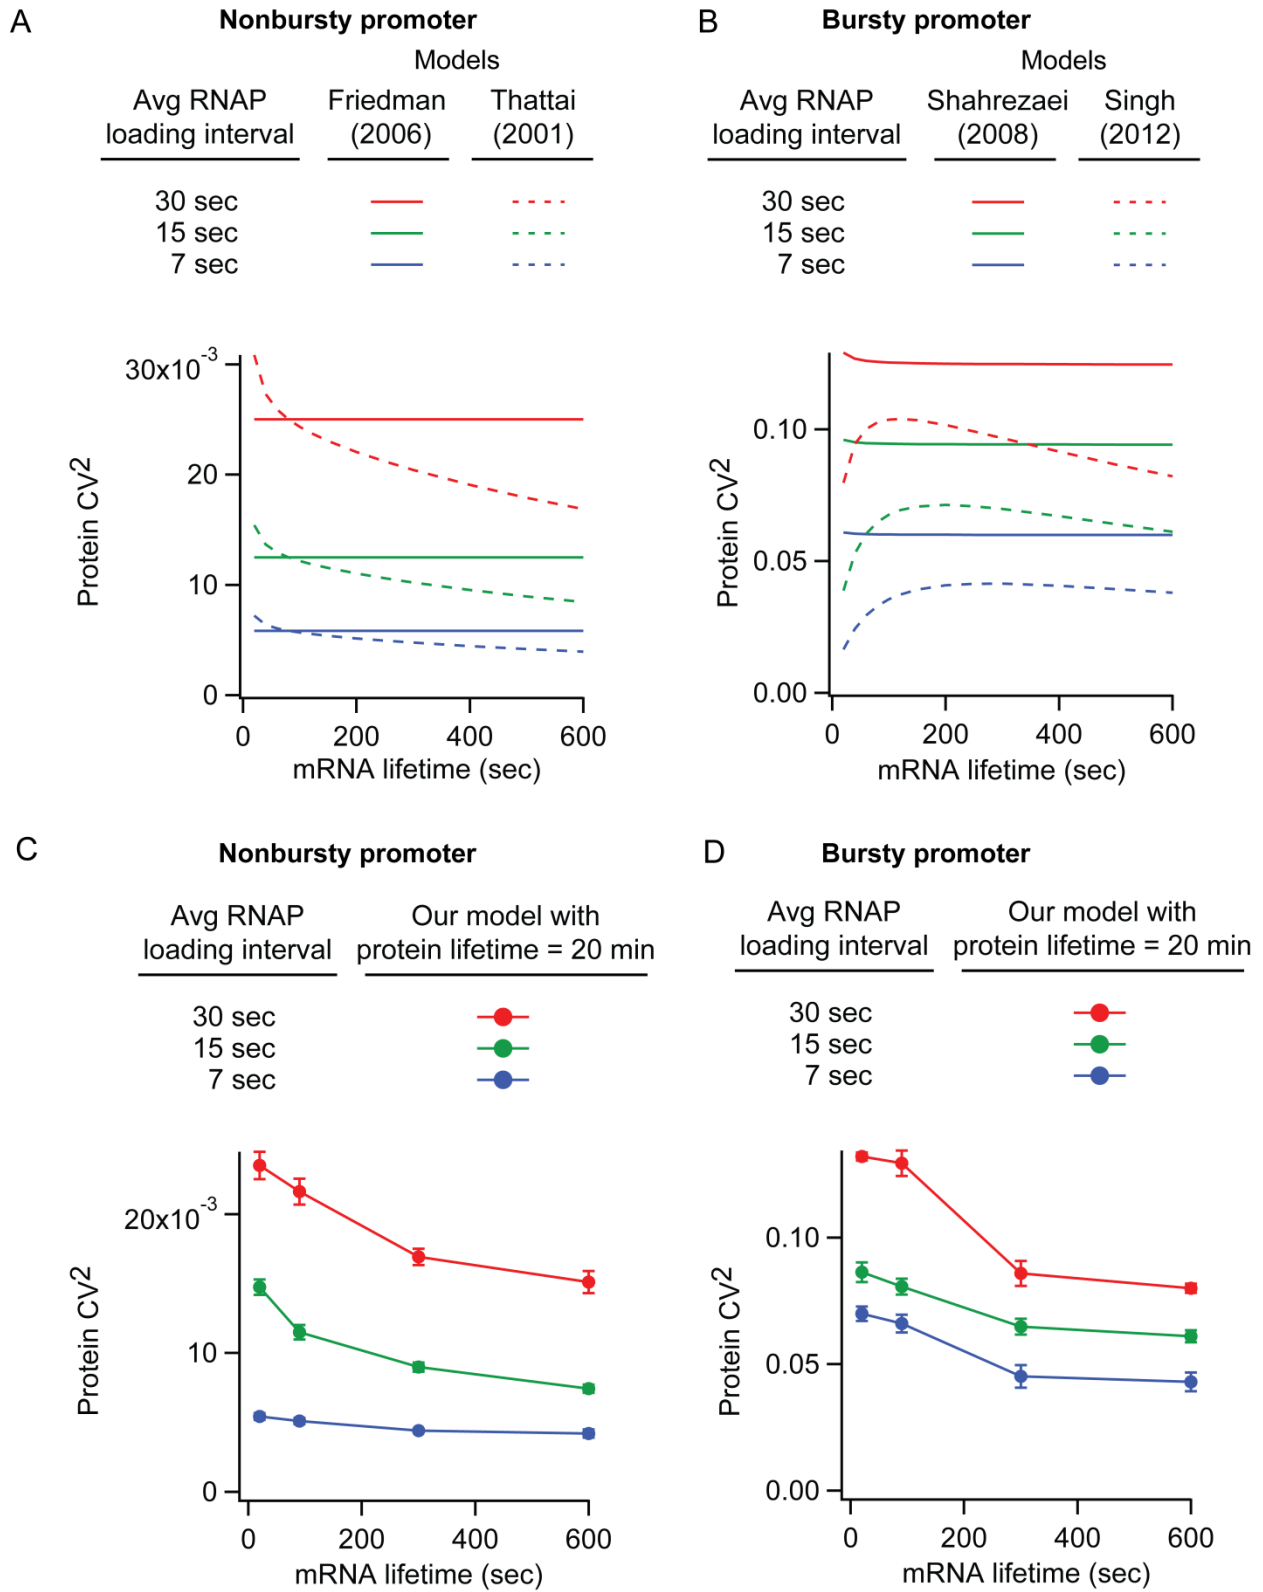

**FIGURE S6. Effect of mRNA lifetime on the noise in protein levels.** (A) Calculations of protein  $CV^2$  as a function of mRNA lifetime using analytical models of nonbursty

transcription initiations by Friedman et al (2006) and Thattai et al (2001), using different average RNAP loading intervals ( $1/k_{\text{loading}}$ ) as input parameters. The model by Friedman et al (2006) assumes that proteins are produced as a random uncorrelated event from each transcript and expects that protein  $CV^2$  does not depend on the mRNA lifetime. In contrast, the model by Thattai et al (2001) predicts a negative effect of mRNA lifetime on  $CV^2$ . (B) Calculations of protein  $CV^2$  as a function of mRNA lifetime using analytical models of bursty transcription initiations by Shahrezaei and Swain (2008) and Singh, et al (2012), using different average RNAP loading intervals as input parameters. Average RNAP loading interval,  $1/(k_{\text{loading}} \cdot f_{\text{ON}})$ , was varied by changing  $f_{\text{ON}}$  while keeping  $k_{\text{loading}}$  and  $k_{\text{ON}}$  the same as in the main text. The model by Shahrezaei and Swain (2008) expects that protein  $CV^2$  is independent of mRNA lifetime under the parameters we used. In contrast, the model by Singh et al (2012) predicts a negative effect of mRNA lifetime on  $CV^2$ . (C) Results from our model of nonbursty transcription initiation for different average RNAP loading intervals. We used  $\tau_{\text{loading}} = 30, 15, 6$  sec as input values to achieve average loading intervals of 30 (red), 15 (green), and 7 (blue) sec, respectively. We calculated protein  $CV^2$  from the protein number distribution at steady state (simulations ran for 60-200 min, instead of 40 min to achieve steady state in protein levels). (D) The same as (C) except for bursty transcription initiations. To obtain the indicated average RNAP loading intervals, we used  $f_{\text{ON}} = 0.1, 0.25, 0.5$ . In all cases (A-D), protein degradation was considered with an arbitrary protein lifetime of 20 min.

Average RNAP loading interval ~15 sec

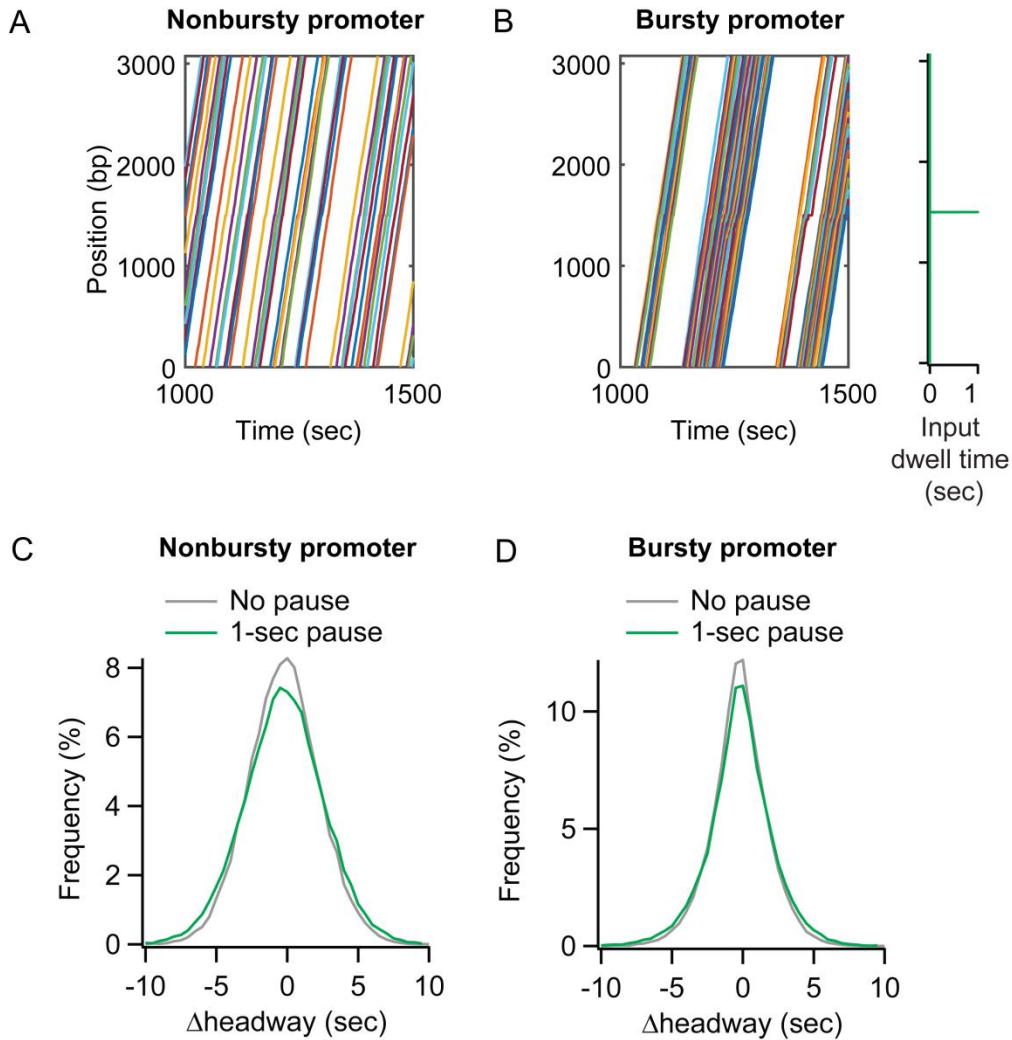

**FIGURE S7. RNAP pauses much shorter than the RNAP loading interval have virtually no effect on RNAP traffic.** (A and B) Trajectories of RNAPs from a representative simulation with a 1-sec pause at  $x_{\text{pause}} = 1500$  nt (with  $p_{\text{pause}} = 100\%$ ). We tested both nonbursty (A) and bursty (B) initiations with the same average RNAP loading interval of ~15 sec measured. Individual RNAP trajectories were parallel to each other and burstiness (or lack thereof) from the promoter was preserved until the end of transcription elongation. This indicates that 1-sec pause did not change RNAP traffic. (C and D) Distributions of headway changes between transcription initiation and termination.

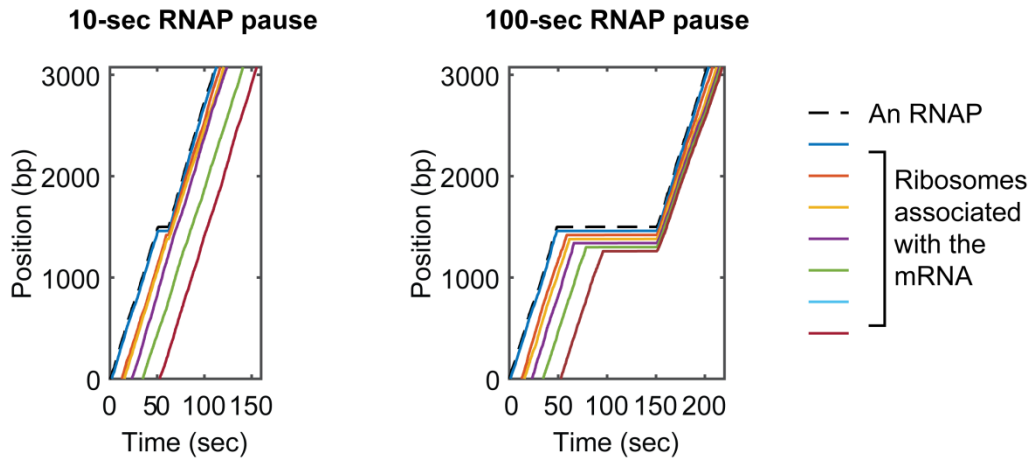

**FIGURE S8. Effect of a very long-lived RNAP pause on ribosome traffic.** The location of ribosomes traveling on a given nascent transcript was plotted over time, together with the location of the RNAP on the DNA, to showcase how an RNAP pause of 10 or 100 sec affects the ribosome traffic. When the RNAP pause duration was  $\sim 10$  sec (left), only a few leading ribosomes piled behind the paused RNAP (dotted line), resulting in a minimal effect on ribosome traffic. If the pause lasted much longer, such as  $\sim 100$  sec (right), most of the ribosomes on the transcript piled behind the paused RNAP and then travelled together as a convoy when the RNAP was released from the pause site, resulting in a protein burst. For illustration purposes, we used the same set of ribosome loading times for both pause scenarios. Five ribosomes loaded on a transcript during its lifetime (mean mRNA lifetime = 90 sec).



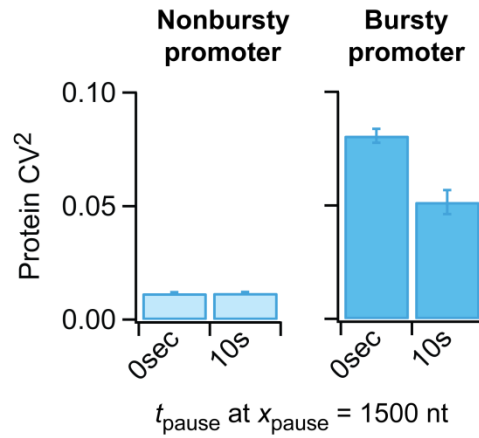

**FIGURE S9. Effect of a high-probability RNAP pause on steady-state protein expression noise.** A high-probability ( $p_{\text{pause}} = 80\%$ ) pause site attenuates steady-state protein noise ( $CV^2$ ) dictated by a bursty transcription initiation when protein degradation (or dilution occurring upon cell division) was included in the model. We chose an arbitrary protein lifetime of 20 min. We used the same input conditions as shown in Fig. 5D and H: an average RNAP loading interval of ~15 sec for both nonbursty and bursty promoters.

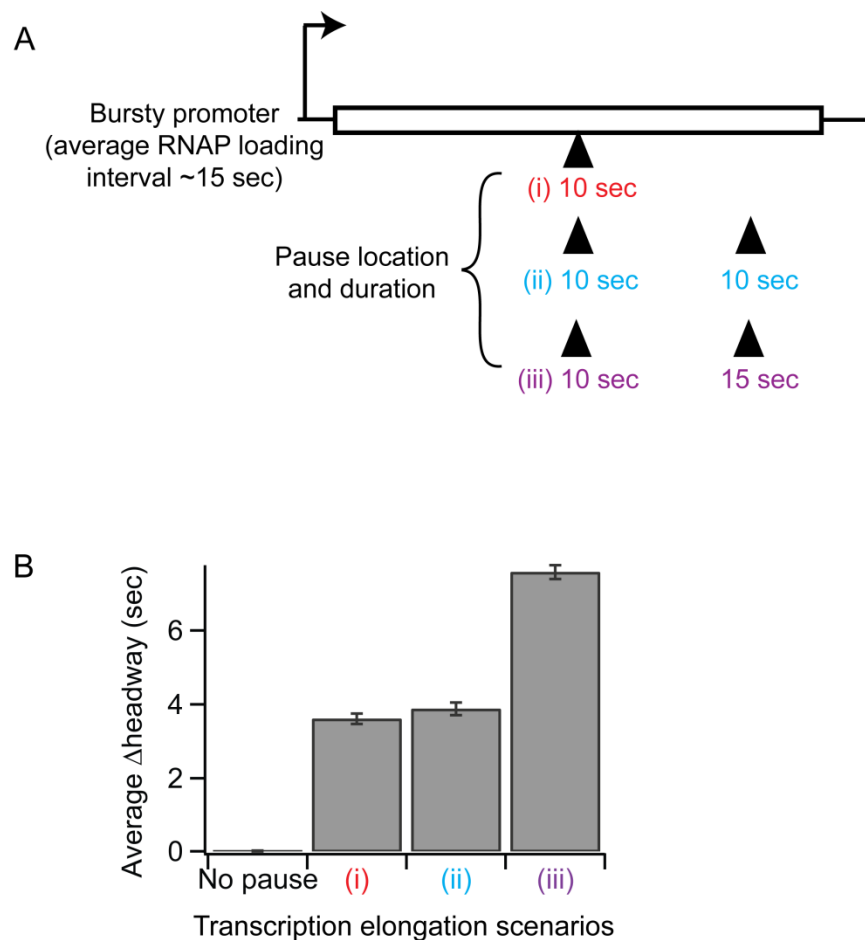

**FIGURE S10. Two pause sites can have additive effects on RNAP traffic depending on their durations.** (A) Relevant simulation conditions. We tested the effects of different pause scenarios on RNAP traffic from a bursty promoter with an average RNAP loading interval of ~15 sec. The pause scenarios tested were (i) a single 10-sec pause at  $x_{\text{pause}} = 1500$  nt, (ii) a 10-sec pause at  $x_{\text{pause}} = 1500$  nt followed by another 10-sec pause at  $x_{\text{pause}} = 2500$  nt, (iii) a 10-sec pause at  $x_{\text{pause}} = 1500$  nt followed by a 15-sec pause at  $x_{\text{pause}} = 2500$  nt (all pause sites with  $p_{\text{pause}} = 100\%$ ). (B) Effect of these pause scenarios on RNAP traffic was measured by the average headway change between initiation and termination of transcription.

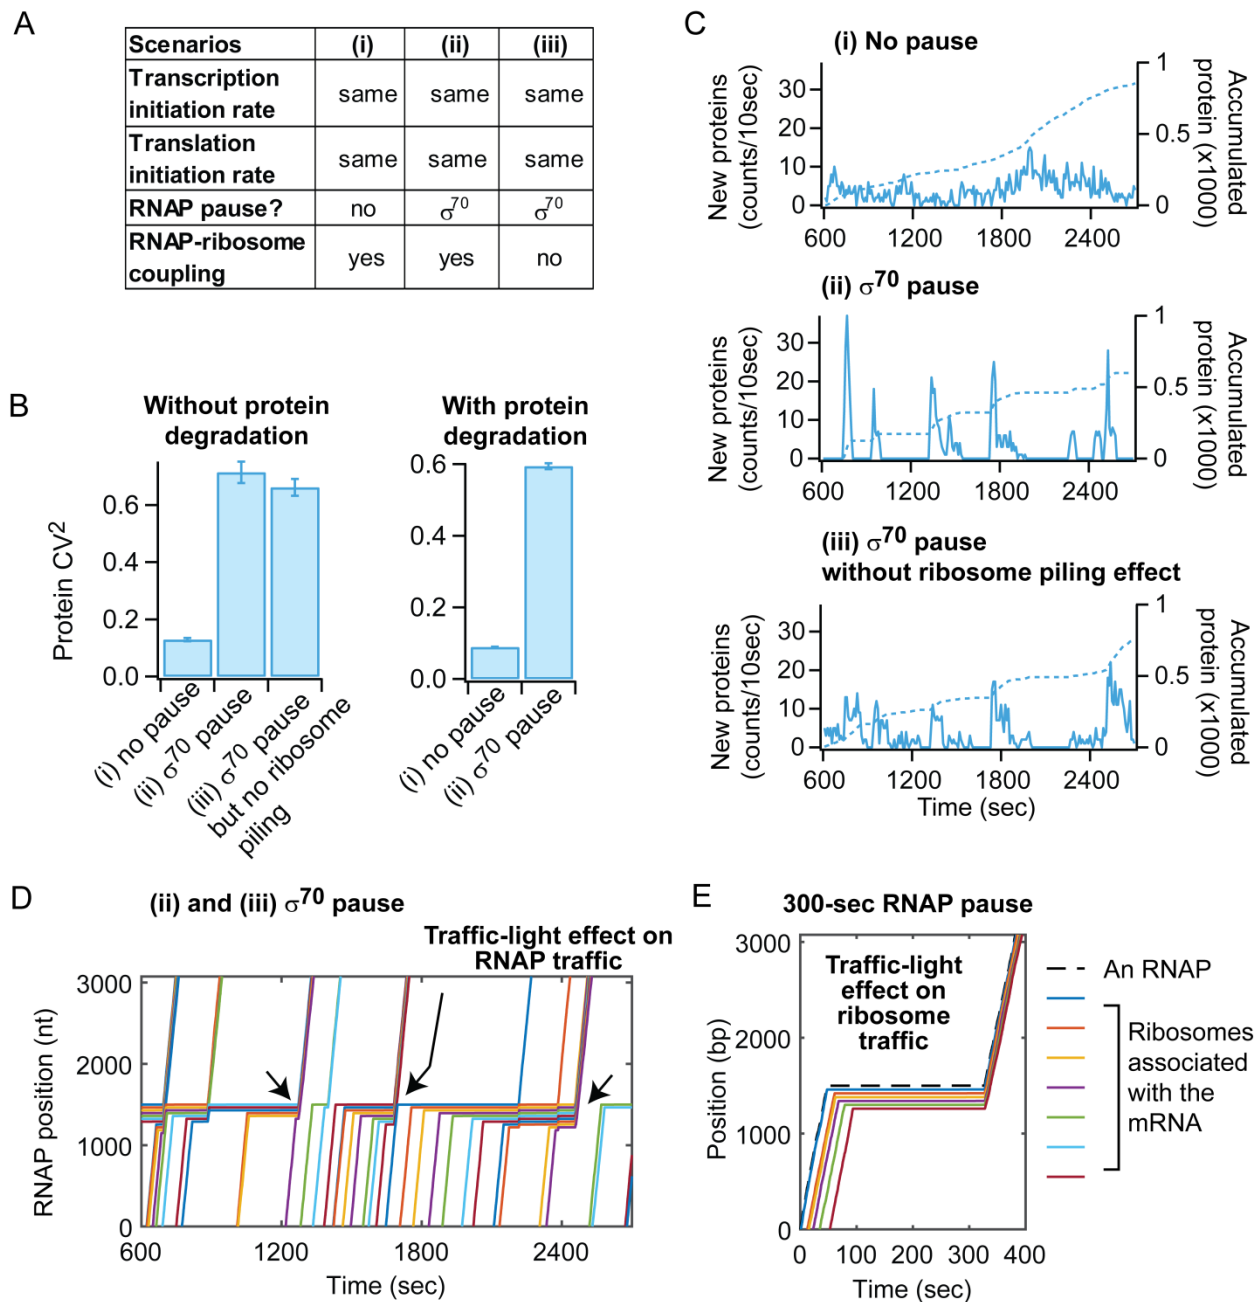

**FIGURE S11. RNAP pause due to  $\sigma^{70}$  retention can increase protein expression noise by creating RNAP convoys.** (A) Three scenarios were considered to examine the potential effect of  $\sigma^{70}$ -RNAP pausing: (i) No pause. (ii)  $\sigma^{70}$ -RNAP pausing: we simulated a pause site for  $\sigma^{70}$ -associated RNAP (and not for RNAPs free of  $\sigma^{70}$ ) at  $x = 1,500$  bp. To match *in vitro* experimental observations (12), we chose  $t_{\text{pause}} = 300$  sec and  $p_{\text{pause}} = 30\%$  (the latter because only 30% of the RNAP population retained  $\sigma^{70}$ ). (iii) Same as (ii) except that the ribosome piling effect was ignored. This was done by ignoring ribosome elongation and modeling translation

after each mRNA is made (i.e., at the end of transcription elongation). This method uncouples transcription and translation and avoids ribosome piling behind paused RNAP. In all three scenarios, we considered a nonbursty transcription initiation and an mRNA lifetime of 90 sec. The input values of transcription and translation initiations were tuned to obtain an average RNAP loading interval of  $\sim 50$  sec and an average ribosome loading rate of  $\sim 0.15 \text{ sec}^{-1}$  as output in all scenarios. (B) Effect of  $\sigma^{70}$ -induced RNAP pausing on protein noise ( $CV^2$ ) for all three scenarios. Comparison between (i) and (iii) shows the contribution of RNAP convoy formation on the  $CV^2$  increase, whereas the comparison between (ii) and (iii) shows the contribution from ribosome convoy formation (ribosome piling behind the paused RNAP). We also found that the  $\sigma^{70}$ -induced RNAP pausing increases protein  $CV^2$  from nonbursty transcription initiation ((i) vs. (ii)) when protein degradation was considered, using an arbitrary protein lifetime of 20 min. (C) Temporal fluctuations in protein production from an example DNA template for each scenario shown in (A). The dotted lines show protein accumulation. Scenario (ii) creates bursts of protein production. To illustrate the effect of ribosome piling on the protein bursts (ii vs. iii), the fluctuations in protein production in (ii) and (iii) were generated using the RNAP trajectories shown in (D). (D) Example RNAP trajectories from scenarios (ii) and (iii) showing a “traffic-light” effect in which back-to-back RNAPs accumulated behind the pause site travel together as a convoy once the pausing ends. (E) Representative ribosome trajectories from scenario (ii). The location of ribosomes for a given nascent transcript was plotted over time to showcase how the long pause by a  $\sigma^{70}$ -associated RNAP causes a “traffic-light” effect on ribosome traffic, in which back-to-back ribosomes accumulated behind the paused RNAP travel together after the pause.

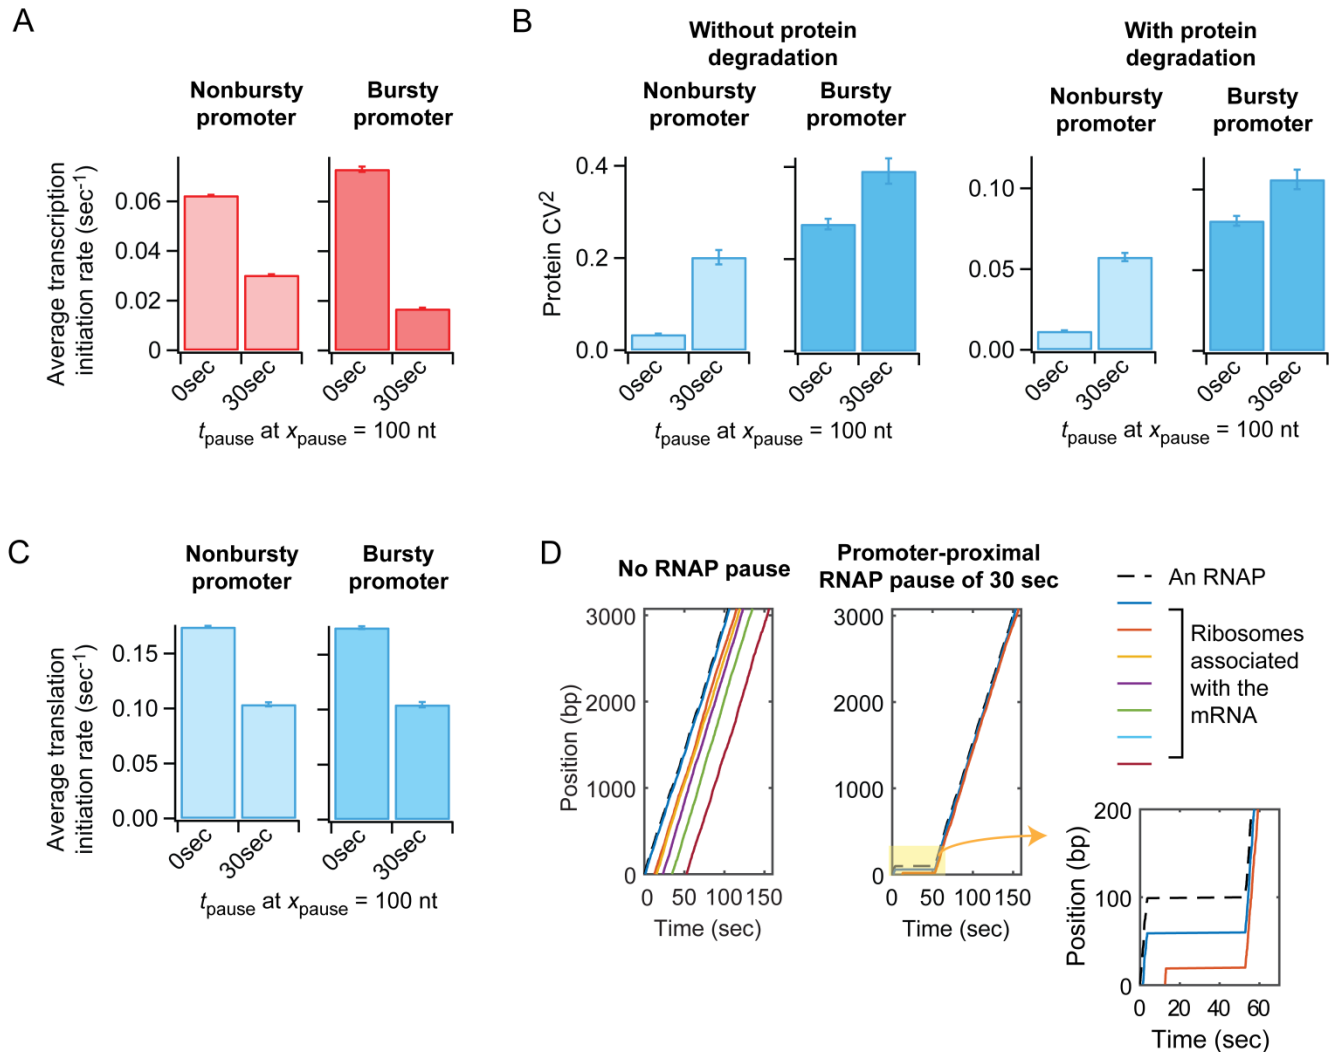

**FIGURE S12. A promoter-proximal RNAP pause can reduce both transcription and translation rates.** (A) A promoter-proximal pause of  $t_{\text{pause}} = 30 \text{ sec}$  ( $x_{\text{pause}} = 100 \text{ nt}$  and  $p_{\text{pause}} = 100\%$ ) lowers the effective transcription initiation rate from both nonbursty and bursty promoters with an input average transcription initiation of  $\sim 1/15 \text{ sec}^{-1}$ . The effect is greater for the bursty promoter, because of the frequent RNAP loading attempts during ON periods. (B) Effect of a promoter-proximal pause of  $t_{\text{pause}} = 30 \text{ sec}$  ( $x_{\text{pause}} = 100 \text{ nt}$  and  $p_{\text{pause}} = 100\%$ ) on protein expression noise from both nonbursty and bursty promoters shown in (A). As a result of lower transcription initiation rate shown in (A), the noise in protein levels ( $CV^2$ ) increases when a promoter-proximal pause site exists. Similar results were obtained when we considered protein degradation (arbitrary protein lifetime of 20 min). (C) Promoter-proximal pausing also lowers the translation initiation rate (promoter and pause properties are the same as noted in (A)). (D)

Promoter-proximal pausing of an RNAP results in piling of ribosomes that can easily reach the RBS and prevent new ribosome loading. (Left) No RNAP pause case: Five ribosomes were loaded on to the transcript and traveled without pausing. (Right) If an RNAP pauses at  $x_{\text{pause}} = 100$  nt for  $\sim 30$  sec, only 2 out of 5 ribosomes were able to load during the mRNA lifetime (see the zoomed trajectories on the right). Once the RNAP pause ends, these two ribosomes form a convoy, as also shown in Fig. S8.



## Supporting References

1. Friedman, N., L. Cai, and X. S. Xie. 2006. Linking stochastic dynamics to population distribution: an analytical framework of gene expression. *Phys. Rev. Lett.* 97:168302.
2. Shahrezaei, V., and P. S. Swain. 2008. Analytical distributions for stochastic gene expression. *Proc. Natl. Acad. Sci. USA.* 105:17256-17261.
3. Singh, A., B. S. Razooky, R. D. Dar, and L. S. Weinberger. 2012. Dynamics of protein noise can distinguish between alternate sources of gene-expression variability. *Mol. Syst. Biol.* 8:607.
4. Thattai, M., and A. van Oudenaarden. 2001. Intrinsic noise in gene regulatory networks. *Proc. Natl. Acad. Sci. USA.* 98:8614-8619.
5. Griffith, K. L., and R. E. Wolf. 2002. Measuring  $\beta$ -galactosidase activity in bacteria: cell growth, permeabilization, and enzyme assays in 96-well arrays. *Biochem. Bioph. Res. Co.* 290:397-402.
6. Joo, C., and T. Ha. 2012. Labeling DNA (or RNA) for single-molecule FRET. *Cold Spring Harbor Protocols* 2012:1005-1008.
7. Jones, D. L., R. C. Brewster, and R. Phillips. 2014. Promoter architecture dictates cell-to-cell variability in gene expression. *Science* 346:1533-1536.
8. So, L.-h., A. Ghosh, C. Zong, L. A. Sepulveda, R. Segev, and I. Golding. 2011. General properties of transcriptional time series in *Escherichia coli*. *Nat. Genet.* 43:554-560.
9. Sliusarenko, O., J. Heinritz, T. Emonet, and C. Jacobs-Wagner. 2011. High-throughput, subpixel precision analysis of bacterial morphogenesis and intracellular spatio-temporal dynamics. *Mol. Microbiol.* 80:612-627.
10. Proshkin, S., A. R. Rahmouni, A. Mironov, and E. Nudler. 2010. Cooperation between translating ribosomes and RNA polymerase in transcription elongation. *Science* 328:504-508.
11. Kepes, A. 1969. Transcription and translation in the lactose operon of *Escherichia coli* studied by in vivo kinetics. *Prog. Biophys. Mol. Biol.* 19:199-236.
12. Harden, T. T., C. D. Wells, L. J. Friedman, R. Landick, A. Hochschild, J. Kondev, and J. Gelles. 2016. Bacterial RNA polymerase can retain  $\sigma 70$  throughout transcription. *Proc. Natl. Acad. Sci. USA.* 113:602-607.
